# Supplementary material for: Cross-species outlier detection reveals different evolutionary pressures between sister species
Source: PubMed Central journal article supplement (PMC4260136; doi:10.1111/nph.12896), 2014-06-18
Supplement: nph0204-0215-SD1.pdf [file nph0204-0215-SD1.pdf]

Supporting Information Table S1. Summary of all loci typed in lodgepole (Lp), and jack pine (Jp), including diversity measures (observed heterozygosity (Ho), expected heterozygosity (UHe)), their estimated linkage group, the data subset they were included in ('Data'), the frequency they were detected as an outlier for each subset of data, the direction of selection, and their putative annotation.

| Locus         | Lodgepole pine |       |       |        | Jack pine |       |       |        | Linkage group | Data       | Outlier Detection |       |             | Introgress | Direction                                                          | Annotation |
|---------------|----------------|-------|-------|--------|-----------|-------|-------|--------|---------------|------------|-------------------|-------|-------------|------------|--------------------------------------------------------------------|------------|
|               | N              | Ho    | UHe   | F      | N         | Ho    | UHe   | F      |               |            | Species           | Lodge | Jack        |            |                                                                    |            |
| Jackc1080p157 | 368            | 0.003 | 0.003 | -0.001 | 100       | 0.270 | 0.263 | -0.031 |               | species/Jp |                   |       | 0.53        |            | RPM1-interacting protein 4 (RIN4) family protein                   |            |
| Jackc1237p470 | 368            | 0.082 | 0.083 | 0.020  | 100       | 0.560 | 0.495 | -0.136 |               | all        | 1                 |       | 0.046       | Negative   | OT U-like cysteine protease                                        |            |
| Jackc1315p459 | 368            | 0.000 | 0.000 |        | 100       | 0.370 | 0.339 | -0.096 |               | species/Jp |                   |       | 0.523       |            | bZIP transcription factor/ABA-responsive element binding protein   |            |
| Jackc1384p110 |                |       |       |        | 100       | 0.430 | 0.426 | -0.014 |               | Jp         |                   |       |             |            | transcribed locus                                                  |            |
| Jackc1410p116 | 364            | 0.052 | 0.051 | -0.027 | 100       | 0.500 | 0.495 | -0.015 |               | all        | 1                 |       | 0.927       |            | postsynaptic protein-related/microtubule-associated protein CRIPT  |            |
| Jackc1450p228 | 367            | 0.008 | 0.008 | -0.004 | 100       | 0.500 | 0.422 | -0.190 |               | species/Jp |                   |       | 0.08        |            | transcribed locus                                                  |            |
| Jackc1483p368 | 345            | 0.006 | 0.006 | -0.003 | 100       | 0.410 | 0.426 | 0.033  |               | species/Jp |                   |       | 0.044       |            | ubiquitin-specific protease 3                                      |            |
| Jackc149p234  | 368            | 0.003 | 0.003 | -0.001 | 100       | 0.270 | 0.249 | -0.089 |               | species/Jp |                   |       | 0.973       |            | 4-hydroxy-3-methylbut-2-enyl diphosphate reductase                 |            |
| Jackc1504p209 | 368            | 0.003 | 0.003 | -0.001 | 100       | 0.300 | 0.309 | 0.025  |               | species/Jp | 2                 |       | 0.002       | Positive   | transcribed locus                                                  |            |
| Jackc152p517  | 368            | 0.160 | 0.170 | 0.056  | 100       | 0.390 | 0.392 | -0.001 |               | all        |                   |       | 0.788       |            | L-asparaginase/ amidohydrolase                                     |            |
| Jackc1570p273 | 367            | 0.000 | 0.000 |        | 99        | 0.505 | 0.496 | -0.023 |               | species/Jp |                   |       | 0.325       |            | protein tyrosine kinase superfamily                                |            |
| Jackc1579p429 |                |       |       |        | 100       | 0.300 | 0.322 | 0.062  |               | Jp         |                   |       |             |            | Pleckstrin homology (PH) domain superfamily protein                |            |
| Jackc1735p209 | 364            | 0.003 | 0.003 | -0.001 | 100       | 0.460 | 0.444 | -0.040 |               | species/Jp |                   |       | LL+LJ-JJ-   |            | mRNA splicing factor/thioredoxin-like/Dim1 family                  |            |
| Jackc1859p368 | 364            | 0.088 | 0.084 | -0.046 | 100       | 0.480 | 0.457 | -0.055 |               | all        |                   |       | 0.788       |            |                                                                    |            |
| Jackc2307p219 |                |       |       |        | 98        | 0.224 | 0.200 | -0.126 |               | Jp         |                   |       |             |            | DnaJ/Hsp40 cystein-rich domain superfamily protein                 |            |
| Jackc2433p173 | 368            | 0.003 | 0.003 | -0.001 | 100       | 0.480 | 0.478 | -0.009 |               | species/Jp |                   |       | LL+LJ-; LL- |            | pentatricopeptide repeat (PPR)/tetratricopeptide repeat (TPR)-like |            |
| Jackc2551p179 |                |       |       |        | 93        | 0.495 | 0.493 | -0.009 | JP01          | Jp         |                   |       |             |            | WD-40 repeat family protein/beige/BEACH domain-related             |            |
| Jackc2623p916 | 368            | 0.008 | 0.008 | -0.004 | 100       | 0.560 | 0.482 | -0.167 |               | species/Jp |                   |       | 0.034       |            | transcribed locus                                                  |            |
| Jackc2888p563 | 368            | 0.090 | 0.091 | 0.010  | 99        | 0.374 | 0.374 | -0.003 |               | all        |                   |       | 0.604       |            | cytokine-induced anti-apoptosis inhibitor 1, Fe-S biogenesis       |            |
| Jackc291p82   |                |       |       |        | 98        | 0.602 | 0.487 | -0.241 |               | Jp         |                   |       |             |            | Heavy metal transport/detoxification superfamily protein           |            |
| Jackc3017p105 | 368            | 0.011 | 0.011 | -0.005 | 100       | 0.450 | 0.502 | 0.100  | JP01          | species/Jp |                   |       | 0.077       |            |                                                                    |            |
| Jackc3080p108 | 368            | 0.003 | 0.003 | -0.001 | 100       | 0.340 | 0.309 | -0.105 |               | species/Jp | 1                 |       | 0.125       | Negative   | myb domain protein 3r-4                                            |            |
| Jackc3589p359 |                |       |       |        | 92        | 0.522 | 0.488 | -0.076 |               | Jp         |                   |       |             |            | cytochrome C1 family                                               |            |
| Jackc3789p280 | 364            | 0.003 | 0.003 | -0.001 | 100       | 0.240 | 0.227 | -0.061 |               | species/Jp |                   |       | 0.142       |            | transcribed locus                                                  |            |
| Jackc391p162  |                |       |       |        | 100       | 0.290 | 0.290 | -0.004 |               | Jp         |                   |       |             |            | photosystem I, PsaA/PsaB protein                                   |            |
| Jackc4003p197 |                |       |       |        | 99        | 0.414 | 0.364 | -0.144 | JP02          | Jp         |                   |       |             |            | O-acetyltransferase protein/Cas1p-like protein                     |            |
| Jackc402p99   | 368            | 0.000 | 0.000 |        | 100       | 0.420 | 0.457 | 0.077  |               | species/Jp | 1                 |       | 0           | Positive   | NADH-ubiquinone oxidoreductase related                             |            |
| Jackc406p342  | 368            | 0.030 | 0.035 | 0.139  | 100       | 0.560 | 0.502 | -0.122 | JP07          | all        | 1                 |       | 0.876       |            | heat shock cognate protein 70-1                                    |            |
| Jackc408p413  | 365            | 0.005 | 0.005 | -0.003 | 100       | 0.580 | 0.486 | -0.199 |               | species/Jp |                   |       | 0.045       |            | protein of unknown function (DUF3411)                              |            |
| Jackc452p299  | 366            | 0.003 | 0.003 | -0.001 | 97        | 0.361 | 0.369 | 0.017  |               | species/Jp |                   |       | 0.531       |            | BEL1-like homeodomain/DNA binding transcription factor             |            |
| Jackc473p320  |                |       |       |        | 99        | 0.485 | 0.459 | -0.061 | JP03          | Jp         |                   |       |             |            | Ribosomal protein L7Ae/L30e/S12e/Gadd45 family protein             |            |
| Jackc480p274  | 367            | 0.289 | 0.274 | -0.056 | 100       | 0.270 | 0.263 | -0.031 |               | all        | 1                 |       | 0.025       | Negative   | Heavy metal transport/detoxification superfamily protein           |            |
| Jackc616p315  |                |       |       |        | 100       | 0.460 | 0.457 | -0.011 | JP04          | Jp         |                   |       |             |            | septin                                                             |            |
| Jackc722p712  | 355            | 0.521 | 0.494 | -0.056 | 99        | 0.465 | 0.491 | 0.049  | LP01/JP05     | all        |                   |       | 0.037       |            | cinnamoyl-CoA reductase/NAD dependent epimerase/dehydratase        |            |
| Jackc816p105  | 367            | 0.011 | 0.011 | -0.005 | 100       | 0.330 | 0.290 | -0.143 |               | species/Jp |                   |       | 0.087       |            |                                                                    |            |
| Jackc833p224  | 352            | 0.548 | 0.501 | -0.097 |           |       |       |        | LP02          | Lp         |                   |       |             |            | CCCH-type zinc finger family protein                               |            |
| Jackc915p369  | 368            | 0.329 | 0.360 | 0.086  | 100       | 0.540 | 0.490 | -0.108 | LP03/JP06     | all        |                   |       | 0.187       |            | ribosomal protein L2 family                                        |            |
| Jackc924p449  |                |       |       |        | 97        | 0.309 | 0.317 | 0.018  |               | Jp         |                   |       |             |            | response regulator                                                 |            |
| Jackc961p604  | 368            | 0.003 | 0.003 | -0.001 | 100       | 0.360 | 0.414 | 0.126  | JP01          | species/Jp |                   |       | N; LL-,LJ+  |            | protochlorophyllide oxidoreductase A/short chain dehydrogenase     |            |
| Jp_c00039p703 | 368            | 0.011 | 0.011 | -0.005 | 100       | 0.390 | 0.382 | -0.026 | JP02          | species/Jp |                   |       | 0.337       |            | adenosine kinase                                                   |            |
| Jp_c00242p897 |                |       |       |        | 97        | 0.629 | 0.502 | -0.260 | JP07          | Jp         |                   |       |             |            | ribosomal protein S5 family protein                                |            |

| Locus          | Lodgepole pine |       |       |        | Jack pine |       |       |        | Linkage group | Data       | Outlier Detection |       |      | Introgress | Direction    | Annotation                                                                    |                                                                      |
|----------------|----------------|-------|-------|--------|-----------|-------|-------|--------|---------------|------------|-------------------|-------|------|------------|--------------|-------------------------------------------------------------------------------|----------------------------------------------------------------------|
|                | N              | Ho    | UHe   | F      | N         | Ho    | UHe   | F      |               |            | Species           | Lodge | Jack |            |              |                                                                               |                                                                      |
| Jp_c00433p427  | 368            | 0.024 | 0.024 | -0.012 | 100       | 0.360 | 0.422 | 0.143  |               | all        |                   |       |      |            | 0.544        | GDSL-link lipase/acylhydrolase                                                |                                                                      |
| Jp_c00542p351  | 368            | 0.049 | 0.048 | -0.025 | 100       | 0.450 | 0.466 | 0.029  |               | all        |                   |       |      |            | 0.172        | transcribed locus                                                             |                                                                      |
| Jp_c00704p802  | 367            | 0.313 | 0.307 | -0.021 | 100       | 0.280 | 0.284 | 0.008  |               | all        |                   |       |      |            | 0.004        | peroxidase 2                                                                  |                                                                      |
| Jp_c01249p362  | 349            | 0.610 | 0.425 | -0.439 | 93        | 0.516 | 0.466 | -0.113 | JP03          | all        | 2                 |       |      |            | 0            | Negative                                                                      | short-chain dehydrogenase-reductase B/KR domain                      |
| Jp_c01798p762  |                |       |       |        | 95        | 0.337 | 0.309 | -0.097 |               | Jp         |                   |       |      |            |              |                                                                               | coatomer gamma subunit putative                                      |
| Jp_c01946p291  |                |       |       |        | 100       | 0.470 | 0.454 | -0.040 | JP04          | Jp         |                   |       |      |            |              |                                                                               | xyloglucan endo-transglycosylase                                     |
| Jp_c01993p623  | 364            | 0.223 | 0.219 | -0.017 | 99        | 0.192 | 0.206 | 0.065  | JPLP01        | all        |                   |       |      |            | 0.628        | protein kinase superfamily                                                    |                                                                      |
| Jp_c01993p67   | 367            | 0.218 | 0.224 | 0.024  | 91        | 0.099 | 0.133 | 0.254  | JPLP01        | all        |                   |       |      |            | 0.386        | protein kinase superfamily                                                    |                                                                      |
| Jp_c02124p853  | 335            | 0.069 | 0.066 | -0.036 | 99        | 0.202 | 0.229 | 0.114  |               | all        | 1                 |       |      |            | 0.748        | Negative                                                                      | NUP50/nucleoporin                                                    |
| Jp_c02580p908  | 368            | 0.011 | 0.011 | -0.005 | 100       | 0.490 | 0.496 | 0.008  |               | species/Jp |                   |       |      |            | 0.002        | ubiquitin-conjugating enzyme                                                  |                                                                      |
| Jp_c03167p296  | 368            | 0.024 | 0.024 | -0.012 | 100       | 0.290 | 0.263 | -0.107 | LP11/JP08     | all        |                   |       |      |            | 0.841        | auxin response factor 1/B3 DNA binding domain                                 |                                                                      |
| Jp_c03167p428  |                |       |       |        | 99        | 0.222 | 0.214 | -0.043 |               | Jp         |                   |       |      |            |              |                                                                               | auxin response factor 1/B3 DNA binding domain                        |
| Jp_c03968p478  | 368            | 0.424 | 0.370 | -0.147 | 100       | 0.360 | 0.333 | -0.085 | LPL1          | all        |                   |       |      |            | 0.044        | plasma membrane intrinsic protein 2;8/aquaporin PIP2                          |                                                                      |
| Jp_c03968p72   | 368            | 0.620 | 0.496 | -0.250 | 100       | 0.110 | 0.104 | -0.058 | LPL1          | all        |                   |       |      |            | 0.02         | plasma membrane intrinsic protein 2;8/aquaporin PIP2                          |                                                                      |
| Jp_c04973p670  | 343            | 0.510 | 0.493 | -0.036 | 100       | 0.470 | 0.491 | 0.038  | LP01/JP05     | all        |                   |       |      |            | 0.042        | alcohol dehydrogenase/zinc-binding dehydrogenase                              |                                                                      |
| Jp_c05130p655  | 368            | 0.011 | 0.011 | -0.005 | 100       | 0.400 | 0.478 | 0.159  |               | species/Jp |                   |       |      |            | 0.223        | voltage dependent anion channel                                               |                                                                      |
| Jp_c05171p407  | 367            | 0.104 | 0.103 | -0.005 | 98        | 0.643 | 0.484 | -0.336 |               | all        |                   |       |      |            | 0.063        | translocase of outer membrane 22-V                                            |                                                                      |
| Jp_c06398p643  | 368            | 0.543 | 0.501 | -0.087 | 100       | 0.380 | 0.367 | -0.042 | LP02          | all        |                   |       |      |            | 0.003        | thylakoid rhodanese-like                                                      |                                                                      |
| Jp_c06551p422  | 368            | 0.095 | 0.100 | 0.052  | 100       | 0.540 | 0.495 | -0.096 |               | all        |                   |       |      |            | 0.92         | photosynthetic electron transfer C                                            |                                                                      |
| Jp_c07427p1497 | 368            | 0.003 | 0.003 | -0.001 | 100       | 0.180 | 0.197 | 0.081  |               | species/Jp |                   |       |      |            | 0.972        | tranlocon outer complex protein/DUF3406                                       |                                                                      |
| Jp_c09653p489  | 367            | 0.324 | 0.358 | 0.093  | 100       | 0.540 | 0.490 | -0.108 | LP03/JP06     | all        |                   |       |      |            | 0.071        | photosystem II reaction center PSB29 protein/thylakoid formation protein      |                                                                      |
| Jp_c12031p335  | 367            | 0.387 | 0.423 | 0.083  | 93        | 0.624 | 0.454 | -0.382 |               | all        | 1                 |       |      |            | 0            | Negative                                                                      | protein of unknown function (DUF538)                                 |
| Jp_c12214p1395 | 368            | 0.071 | 0.073 | 0.035  | 100       | 0.460 | 0.482 | 0.042  |               | all        |                   |       |      |            | LL-; LJ-,JJ+ | homeobox domain                                                               |                                                                      |
| Jp_c12920p1329 | 366            | 0.025 | 0.024 | -0.012 | 100       | 0.280 | 0.270 | -0.042 |               | all        |                   |       |      |            | 0.302        | inner membrane family protein                                                 |                                                                      |
| Jp_c13093p749  | 364            | 0.025 | 0.024 | -0.013 | 100       | 0.550 | 0.496 | -0.113 | LP04/JP11     | all        |                   | 2     |      |            | 0.001        | Positive                                                                      | HSP20-like chaperones superfamily protein                            |
| Jp_c13875p1478 | 367            | 0.071 | 0.068 | -0.037 |           |       |       |        | LP05          | Lp         |                   | 2     |      |            |              |                                                                               | pectin methylesterase                                                |
| Jp_c15855p785  | 368            | 0.185 | 0.202 | 0.086  | 100       | 0.310 | 0.290 | -0.074 |               | all        | 1                 |       |      |            | 0            | Negative                                                                      | A20/AN1-like zinc finger family protein                              |
| Jp_c15992p560  | 368            | 0.014 | 0.014 | -0.007 | 96        | 0.219 | 0.313 | 0.297  |               | species/Jp |                   |       |      |            | 0.061        | transducin/WD-40 repeat-like superfamily/homologue of yeast autophagy         |                                                                      |
| Jp_c17571p991  | 368            | 0.003 | 0.003 | -0.001 | 100       | 0.500 | 0.474 | -0.061 |               | species/Jp |                   |       |      |            | 0.413        | high cyclic electron flow 1/fructose 1-6-bisphosphatase                       |                                                                      |
| Jp_c18278p614  |                |       |       |        | 95        | 0.368 | 0.446 | 0.169  |               | Jp         |                   |       |      |            |              |                                                                               | thioredoxin superfamily protein                                      |
| Jp_c18600p510  | 353            | 0.003 | 0.003 | -0.001 | 99        | 0.293 | 0.279 | -0.055 |               | species/Jp |                   |       |      |            | 0.009        | ribosomal protein L32                                                         |                                                                      |
| Jp_c19293p339  |                |       |       |        | 99        | 0.404 | 0.500 | 0.188  |               | Jp         |                   |       |      |            |              |                                                                               | glutathione s-transferase/translation elongation factor              |
| Jp_c20036p1123 | 367            | 0.079 | 0.076 | -0.041 | 100       | 0.390 | 0.361 | -0.085 |               | all        |                   |       |      |            | 0.345        | S-formylglutathione hydrolase/esterase                                        |                                                                      |
| Jp_c20182p499  | 367            | 0.079 | 0.076 | -0.041 | 100       | 0.230 | 0.263 | 0.122  |               | all        |                   |       |      |            | 0.054        | transcribed locus                                                             |                                                                      |
| Jp_c20432p742  | 368            | 0.005 | 0.005 | -0.003 | 100       | 0.230 | 0.235 | 0.015  |               | species/Jp | 1                 |       |      |            | 0.073        | Positive                                                                      | phytoene desaturation 1/4-hydroxyphenylpyruvate/Glyoxalase/Bleomycin |
| Jp_c20538p910  | 344            | 0.523 | 0.481 | -0.089 | 99        | 0.505 | 0.502 | -0.010 |               | all        | 1                 |       |      |            | 0            | Negative                                                                      | transcribed locus/glycine rich protein                               |
| Jp_c20590p588  | 354            | 0.045 | 0.044 | -0.023 | 100       | 0.480 | 0.486 | 0.008  |               | all        |                   | 1     |      |            | 0.136        | RNA -binding protein/RNA recognition motif                                    |                                                                      |
| Jp_c20770p419  | 368            | 0.008 | 0.008 | -0.004 | 100       | 0.590 | 0.426 | -0.392 |               | species/Jp |                   |       |      |            | 0.017        | eukaryotic translation initiation factor 2 beta subunit                       |                                                                      |
| Jp_c20964p544  | 368            | 0.076 | 0.073 | -0.040 | 100       | 0.350 | 0.351 | -0.004 |               | all        |                   |       |      |            | 0.793        | NAD(P)-binding Rossmann-fold superfamily protein/short chain dehydrogenase    |                                                                      |
| Jp_c21015p448  | 368            | 0.168 | 0.154 | -0.092 | 100       | 0.420 | 0.414 | -0.020 |               | all        |                   |       |      |            | 0.861        | P-loop containing nucleoside triphosphate hydrolase/SRP54-type, GTPase domain |                                                                      |
| Jp_c21018p454  | 365            | 0.003 | 0.003 | -0.001 | 100       | 0.560 | 0.502 | -0.122 |               | species/Jp |                   |       |      |            | 0.201        | erythronate-4 phosphate dehydrogenase family protein                          |                                                                      |
| Jp_c21171p1069 | 353            | 0.445 | 0.485 | 0.082  | 99        | 0.323 | 0.324 | -0.003 |               | all        |                   |       |      |            | 0.114        | S-adenosyl-L-homocysteine hydrolase/NAD binding domain                        |                                                                      |
| Jp_c21224p439  | 368            | 0.402 | 0.381 | -0.057 | 100       | 0.350 | 0.351 | -0.004 |               | all        | 2                 |       |      |            | 0.547        | Negative                                                                      | transketolase/dehydrogenase-5-phosphate synthase                     |

| Locus          | Lodgepole pine |       |       |        | Jack pine |       |       |        | Linkage group | Data       | Outlier Detection |       |       | Introgress | Direction                                                                            | Annotation |
|----------------|----------------|-------|-------|--------|-----------|-------|-------|--------|---------------|------------|-------------------|-------|-------|------------|--------------------------------------------------------------------------------------|------------|
|                | N              | Ho    | UHe   | F      | N         | Ho    | UHe   | F      |               |            | Species           | Lodge | Jack  |            |                                                                                      |            |
| Jp_c21306p1347 | 367            | 0.000 | 0.000 |        | 92        | 0.511 | 0.459 | -0.118 |               | species/Jp |                   |       | 0.816 |            | glyceraldehyde 3-phosphate dehydrogenase of plastid 1                                |            |
| Jp_c21401p474  | 367            | 0.177 | 0.171 | -0.040 | 100       | 0.510 | 0.494 | -0.038 |               | all        |                   |       | 0.303 |            | pyridine nucleotide-disulphide oxidoreductase/monodehydroascorbate reductase 1       |            |
| Jp_c21871p717  | 352            | 0.020 | 0.020 | -0.010 | 99        | 0.414 | 0.473 | 0.120  |               | all        |                   |       | 0.618 |            | methionine sulfoxide reductase B 2                                                   |            |
| Jp_c21979p359  |                |       |       |        | 100       | 0.320 | 0.284 | -0.134 |               | Jp         |                   |       |       |            | ribosomal protein S26e                                                               |            |
| Jp_c22176p294  | 352            | 0.006 | 0.006 | -0.003 | 100       | 0.510 | 0.466 | -0.100 |               | species/Jp |                   |       | 0.348 |            | Protein of unknown function (DUF1230)                                                |            |
| Jp_c22804p650  |                |       |       |        | 98        | 0.429 | 0.427 | -0.009 |               | Jp         |                   |       |       |            | aldose 1-epimerase/galactose mutartotase-like superfamily protein                    |            |
| Jp_c23049p629  | 367            | 0.379 | 0.393 | 0.036  | 100       | 0.290 | 0.351 | 0.168  |               | all        |                   |       | 0.183 |            | papain family cysteine protease/cathepsin propeptide inhibitor domain                |            |
| Jp_c23259p1067 | 368            | 0.016 | 0.016 | -0.008 | 100       | 0.400 | 0.396 | -0.015 |               | species/Jp |                   |       | 0.05  |            | SIT4 phosphatase-associated family protein                                           |            |
| Jp_c23409p668  | 368            | 0.024 | 0.024 | -0.012 | 100       | 0.560 | 0.499 | -0.127 |               | all        |                   | 2     | 0.205 | Positive   | glyoxalase/bleomycin resistance protein/dioxygenase superfamily                      |            |
| Jp_c23680p1524 | 368            | 0.014 | 0.019 | 0.279  | 100       | 0.390 | 0.484 | 0.191  |               | all        |                   | 1     | 0.115 |            | copper amine oxidase family protein                                                  |            |
| Jp_c23867p705  | 367            | 0.003 | 0.003 | -0.001 | 100       | 0.400 | 0.387 | -0.040 |               | species/Jp |                   |       | 0.374 |            | peroxin 11D                                                                          |            |
| Jp_c23884p704  | 368            | 0.011 | 0.011 | -0.005 | 100       | 0.540 | 0.503 | -0.080 |               | species/Jp |                   |       | 0.572 |            | signal peptide peptidase like-2                                                      |            |
| Jp_c24821p611  | 368            | 0.027 | 0.027 | -0.014 | 100       | 0.320 | 0.284 | -0.134 |               | all        |                   | 1     | 0.494 | Positive   | nodulin MtN3 family protein                                                          |            |
| Jp_c25025p252  | 339            | 0.024 | 0.035 | 0.321  | 100       | 0.470 | 0.496 | 0.048  |               | all        |                   |       | 0.341 |            | ubiquitin-like superfamily/UBL5                                                      |            |
| Jp_c25075p377  | 368            | 0.416 | 0.419 | 0.005  | 100       | 0.560 | 0.451 | -0.248 |               | all        |                   | 2     | 0     | Negative   | phenylcoumaran benzylic ether reductase/NmrA-like negative transcriptional regulator |            |
| Jp_c25220p628  | 368            | 0.033 | 0.032 | -0.017 | 100       | 0.470 | 0.480 | 0.017  |               | all        |                   |       | 0.168 |            | ribosomal protein L19e                                                               |            |
| Jp_c25513p539  | 359            | 0.435 | 0.456 | 0.046  | 100       | 0.450 | 0.476 | 0.050  | LP06          | all        |                   | 1     | 0.033 | Negative   | ribosomal protein L6                                                                 |            |
| Jp_c26007p766  | 368            | 0.003 | 0.003 | -0.001 | 100       | 0.280 | 0.242 | -0.163 |               | species/Jp |                   |       | 0.102 |            | glycine cleavage T-protein/aminomethyltransferase folate binding domain              |            |
| Jp_c26456p564  | 368            | 0.171 | 0.170 | -0.007 |           |       |       |        |               | Lp         |                   |       |       |            | 40S ribosomal protein S4; Provisional                                                |            |
| Jp_c26537p1091 | 368            | 0.068 | 0.076 | 0.103  | 100       | 0.320 | 0.322 | 0.000  |               | all        |                   | 1     | 0.133 |            | homeobox domain/Homeobox-leucine zipper protein family                               |            |
| Jp_c26967p1321 | 368            | 0.008 | 0.008 | -0.004 | 100       | 0.530 | 0.500 | -0.065 |               | species/Jp |                   | 1     | 0.06  | Negative   | S-adenosylmethionine-dependent methyltransferase superfamily protein                 |            |
| Jp_c27011p1002 | 368            | 0.005 | 0.005 | -0.003 | 100       | 0.530 | 0.494 | -0.078 |               | species/Jp |                   |       | 0.865 |            | targeting protein for Xklp2 (TPX2)                                                   |            |
| Jp_c27188p1706 | 368            | 0.003 | 0.003 | -0.001 | 99        | 0.505 | 0.475 | -0.068 |               | species/Jp |                   |       | 0.32  |            | suppressor of abi3-5                                                                 |            |
| Jp_c27585p643  | 367            | 0.409 | 0.455 | 0.100  | 100       | 0.460 | 0.502 | 0.080  |               | all        |                   | 1     | 0     | Negative   | alpha-L-arabinofuranosidase/kelch motif                                              |            |
| Jp_c27768p690  | 368            | 0.285 | 0.271 | -0.053 | 100       | 0.460 | 0.501 | 0.077  |               | all        |                   |       | 0.079 |            | papain family cysteine protease/cathepsin propeptide inhibitor domain                |            |
| Jp_c27995p367  | 363            | 0.008 | 0.014 | 0.396  | 100       | 0.540 | 0.499 | -0.087 |               | species/Jp |                   |       | 0.05  |            | transcribed locus/BES1-interacting Myc-like protein 2                                |            |
| Jp_c28163p1406 | 368            | 0.022 | 0.027 | 0.189  | 100       | 0.160 | 0.148 | -0.087 |               | all        |                   | 1     | 0.019 |            | CCT motif family protein                                                             |            |
| Jp_c28414p495  | 303            | 0.251 | 0.398 | 0.369  | 97        | 0.423 | 0.489 | 0.131  |               | all        |                   |       | 0     |            | cytochrome c oxidase;electron carriers                                               |            |
| Jp_c28904p670  | 368            | 0.011 | 0.011 | -0.005 | 100       | 0.350 | 0.488 | 0.279  |               | species/Jp |                   | 2     | 0     | Positive   | ubiquitin-conjugating enzyme 28//E3 interaction residues                             |            |
| Jp_c28943p445  | 362            | 0.011 | 0.011 | -0.006 | 100       | 0.380 | 0.387 | 0.012  |               | species/Jp |                   |       | 0.543 |            | ubiquitin-conjugating enzyme/ IQ-domain 26                                           |            |
| Jp_c28993p1003 | 368            | 0.459 | 0.475 | 0.032  | 100       | 0.440 | 0.405 | -0.091 | JPL1          | all        |                   |       | 0.452 |            | GRAS family transcription factor                                                     |            |
| Jp_c28993p897  | 367            | 0.019 | 0.019 | -0.010 | 100       | 0.440 | 0.414 | -0.068 | JPL1          | all        |                   | 1     | 0.224 | Positive   | GRAS family transcription factor                                                     |            |
| Jp_c29875p506  | 368            | 0.003 | 0.003 | -0.001 | 100       | 0.420 | 0.437 | 0.035  |               | species/Jp |                   |       | 0.992 |            | transcribed locus                                                                    |            |
| Jp_c30646p698  | 363            | 0.003 | 0.003 | -0.001 | 100       | 0.300 | 0.284 | -0.063 |               | species/Jp |                   |       | 0.135 |            | mitochondrial carrier family protein (isoform 1)                                     |            |
| Jp_c31376p1552 | 368            | 0.043 | 0.043 | -0.022 | 100       | 0.560 | 0.497 | -0.131 |               | all        |                   |       | 0.445 |            | ATP binding;ATP-dependent helicases;DNA helicases                                    |            |
| Jp_c31636p544  | 367            | 0.281 | 0.287 | 0.019  | 100       | 0.420 | 0.405 | -0.042 |               | all        |                   |       | 0.477 |            | methylenetetrahydrofolate reductase                                                  |            |
| Jp_c32144p353  |                |       |       |        | 99        | 0.535 | 0.489 | -0.099 |               | Jp         |                   |       |       |            | Protein kinase superfamily protein                                                   |            |
| Jp_c32861p648  |                |       |       |        | 95        | 0.326 | 0.414 | 0.207  |               | Jp         |                   |       |       |            | ubiquitin-related modifier                                                           |            |
| Jp_c33062p504  | 362            | 0.008 | 0.008 | -0.004 | 100       | 0.400 | 0.451 | 0.109  |               | species/Jp |                   |       | 0.963 |            | cytochrome c oxidase related                                                         |            |
| Jp_c33476p566  | 368            | 0.087 | 0.088 | 0.013  | 99        | 0.485 | 0.470 | -0.036 |               | all        |                   |       | 0.897 |            | CLP protease regulatory subunit                                                      |            |
| Jp_c34152p781  | 347            | 0.127 | 0.124 | -0.024 | 99        | 0.515 | 0.502 | -0.031 |               | all        |                   | 2     | 0.018 | Positive   | ribosomal protein L27                                                                |            |
| Jp_c34224p545  | 368            | 0.011 | 0.011 | -0.005 | 100       | 0.450 | 0.418 | -0.082 |               | species/Jp |                   |       | 0.434 |            | transcribed locus                                                                    |            |
| Jp_c34823p887  |                |       |       |        | 95        | 0.516 | 0.495 | -0.048 |               | Jp         |                   |       |       |            | ribosomal S3A                                                                        |            |

| Locus           | Lodgepole pine |       |       |        | Jack pine |       |       |        | Linkage group | Data       | Outlier Detection |       |       | Introgress | Direction                                                                    | Annotation |
|-----------------|----------------|-------|-------|--------|-----------|-------|-------|--------|---------------|------------|-------------------|-------|-------|------------|------------------------------------------------------------------------------|------------|
|                 | N              | Ho    | UHe   | F      | N         | Ho    | UHe   | F      |               |            | Species           | Lodge | Jack  |            |                                                                              |            |
| Jp_c34902p455   | 365            | 0.005 | 0.005 | -0.003 | 100       | 0.490 | 0.488 | -0.009 |               | species/Jp | 1                 |       | 0.768 | Positive   | copper/zinc superoxide dismutase                                             |            |
| Jp_c38919p628   | 362            | 0.304 | 0.288 | -0.057 |           |       |       |        |               | Lp         |                   |       |       |            | caleosin-related family protein/responsive to dessication 20                 |            |
| Jp_c40483p485   | 368            | 0.005 | 0.005 | -0.003 | 100       | 0.430 | 0.410 | -0.055 | JPL3          | species/Jp | 1                 |       | 0.57  | Positive   | pyridine nucleotide-disulphide oxidoreductase                                |            |
| Jp_c40483p739   | 368            | 0.008 | 0.008 | -0.004 | 100       | 0.430 | 0.410 | -0.055 | JPL3          | species/Jp | 1                 |       | 0.624 | Positive   | pyridine nucleotide-disulphide oxidoreductase                                |            |
| Jp_c40635p369   | 368            | 0.000 | 0.000 |        | 100       | 0.510 | 0.480 | -0.067 |               | species/Jp |                   |       | 0.931 |            | photosystem II subunit Q-2/Oxygen evolving enhancer protein 3                |            |
| Jp_c43016p279   | 352            | 0.014 | 0.014 | -0.007 | 100       | 0.340 | 0.309 | -0.105 |               | species/Jp |                   |       | 0.02  |            | transcribed locus                                                            |            |
| Jp_c43058p705   | 366            | 0.011 | 0.011 | -0.005 | 100       | 0.380 | 0.405 | 0.058  |               | species/Jp | 1                 |       | 0.001 | Positive   | HSP20-like chaperones superfamily protein                                    |            |
| Jp_c43213p458   | 368            | 0.019 | 0.019 | -0.010 | 100       | 0.900 | 0.499 | -0.812 | LP07          | all        |                   | 2     | 0     | Positive   | lipid transfer protein/seed storage 25 albumin superfamily protein           |            |
| Jp_c43596p385   | 367            | 0.005 | 0.005 | -0.003 | 100       | 0.510 | 0.471 | -0.088 | JP13          | species/Jp |                   |       | 0.106 |            | peptide transporter                                                          |            |
| Jp_c43942p268   | 367            | 0.213 | 0.232 | 0.081  | 100       | 0.330 | 0.410 | 0.190  |               | all        |                   |       | 0.837 |            | alpha/beta hydrolases superfamily/dienelactone hydrolase family              |            |
| Jp_c43969p509   | 366            | 0.123 | 0.116 | -0.066 | 99        | 0.525 | 0.501 | -0.053 |               | all        |                   |       | 0.883 |            | ribosomal protein L13e/breat basic conserved 1                               |            |
| Jp_c44066p1378  | 368            | 0.019 | 0.019 | -0.010 | 100       | 0.410 | 0.401 | -0.028 |               | all        |                   |       | 0.7   |            | little nuclei like                                                           |            |
| Jp_c44467p708   | 368            | 0.005 | 0.005 | -0.003 | 100       | 0.380 | 0.414 | 0.077  |               | species/Jp |                   |       | 0.207 |            | ubiquitin-conjugating enzyme                                                 |            |
| Jp_c44595p1466  | 363            | 0.146 | 0.181 | 0.193  | 100       | 0.460 | 0.414 | -0.117 |               | all        |                   |       | 0.079 |            | alpha-galactosidase 2/glycosyl hydrolase family 31                           |            |
| Jp_c44637p536   | 368            | 0.022 | 0.022 | -0.011 | 100       | 0.470 | 0.502 | 0.059  | LP07          | all        |                   | 2     | 0.579 | Positive   | coatomer alpha subunit/glycine-rich protein                                  |            |
| Jp_c44933p494   | 368            | 0.024 | 0.024 | -0.012 | 100       | 0.390 | 0.410 | 0.043  |               | all        | 1                 | 2     | 0.139 | Positive   | photosystem II reaction center protein                                       |            |
| Jp_c45253p360   |                |       |       |        | 99        | 0.354 | 0.364 | 0.024  |               | Jp         |                   |       |       |            | ribosomal L22e protein family                                                |            |
| Jp_c45986p341   | 360            | 0.008 | 0.008 | -0.004 | 100       | 0.450 | 0.496 | 0.089  |               | species/Jp |                   |       | 0.089 |            | ribosomal protein S14p/S29e family protein                                   |            |
| Jp_c46035p392   |                |       |       |        | 100       | 0.390 | 0.410 | 0.043  |               | Jp         |                   |       |       |            | ribosomal protein S13/S18 family                                             |            |
| Jp_c46992p573   | 367            | 0.016 | 0.016 | -0.008 | 100       | 0.370 | 0.372 | 0.000  |               | species/Jp |                   |       | 0.21  |            | zinc finer (C2H2 type) family protein                                        |            |
| JpLpc00337p904  | 367            | 0.311 | 0.302 | -0.029 | 100       | 0.040 | 0.039 | -0.020 | LP08          | all        |                   | 1     | 0.207 |            | basic helix-loop-helix (bHLH) DNA-binding superfamily protein                |            |
| JpLpc00745p1003 | 368            | 0.457 | 0.473 | 0.034  | 100       | 0.030 | 0.030 | -0.015 | LP09          | all        | removed           |       | 0.326 |            | protein kinases/ubiquitin-protein ligase                                     |            |
| JpLpc00988p408  | 368            | 0.011 | 0.011 | -0.005 | 100       | 0.460 | 0.463 | 0.002  |               | species/Jp |                   |       | 0.252 |            | WRKY DNA binding domain                                                      |            |
| JpLpc01929p219  | 368            | 0.495 | 0.501 | 0.011  | 100       | 0.210 | 0.205 | -0.032 | JP09          | all        |                   |       | 0.001 |            | CHASE domain containing histidine kinase protein                             |            |
| JpLpc02715p437  | 367            | 0.112 | 0.110 | -0.013 | 99        | 0.515 | 0.495 | -0.046 |               | all        |                   |       | 0     |            | transcribed locus                                                            |            |
| JpLpc02733p310  | 368            | 0.011 | 0.011 | -0.005 | 100       | 0.270 | 0.339 | 0.200  |               | species/Jp | 1                 |       | 0.998 | Positive   | transcribed locus                                                            |            |
| JpLpc03397p578  | 359            | 0.206 | 0.203 | -0.019 | 100       | 0.030 | 0.030 | -0.015 |               | all        |                   |       | 0.33  |            | SNARE associated golgi protein                                               |            |
| JpLpc03587p814  | 367            | 0.395 | 0.375 | -0.056 | 100       | 0.010 | 0.010 | -0.005 |               | species/Lp |                   |       | 0.615 |            | protein kinase/casein kinase 1                                               |            |
| JpLpc04112p1237 | 365            | 0.008 | 0.014 | 0.396  | 100       | 0.490 | 0.494 | 0.003  | JP01          | species/Jp |                   |       | 0.01  |            | SSXT family protein                                                          |            |
| JpLpc04112p131  | 368            | 0.046 | 0.045 | -0.024 | 100       | 0.010 | 0.010 | -0.005 |               | species/Lp | 1                 |       | 0.123 | Positive   | SSXT family protein                                                          |            |
| JpLpc04689p1306 | 325            | 0.403 | 0.405 | 0.004  |           |       |       |        | LPL2          | Lp         |                   |       |       |            | similar to Arabisopsis thaliana At1g70160/                                   |            |
| JpLpc04689p1619 | 364            | 0.448 | 0.438 | -0.024 | 100       | 0.000 | 0.000 |        | LPL2          | species/Lp |                   |       | 0.105 |            | similar to Arabisopsis thaliana At1g70160/                                   |            |
| JpLpc05265p1240 | 368            | 0.024 | 0.029 | 0.169  | 100       | 0.000 | 0.000 |        |               | species/Lp |                   |       | 0.073 |            | transcribed locus                                                            |            |
| JpLpc06142p940  | 368            | 0.497 | 0.488 | -0.021 | 100       | 0.450 | 0.476 | 0.050  |               | all        | 1                 |       | 0.782 | Negative   | transcribed locus                                                            |            |
| JpLpc07372p371  | 368            | 0.484 | 0.497 | 0.025  | 100       | 0.040 | 0.039 | -0.020 |               | all        |                   |       | 0.726 |            | stabilizer of ion transporter SufD/polynucleotidyl transferase               |            |
| JpLpc07589p2036 | 367            | 0.278 | 0.306 | 0.090  | 100       | 0.280 | 0.284 | 0.008  |               | all        | 1                 |       | 0.283 | Negative   | NADH-ubiquinone dehydrogenase/molybdopterin oxidoreductase                   |            |
| JpLpc08428p772  | 368            | 0.011 | 0.011 | -0.005 | 100       | 0.530 | 0.448 | -0.190 |               | species/Jp |                   |       | 0.012 |            | alpha and gamma adaptin binding protein                                      |            |
| JpLpc09880p1739 | 362            | 0.086 | 0.082 | -0.045 | 99        | 0.172 | 0.206 | 0.164  |               | all        |                   |       | 0     |            | methyltransferase domain/tellurite resistance protein                        |            |
| JpLpc10450p806  | 368            | 0.440 | 0.434 | -0.015 | 100       | 0.050 | 0.049 | -0.026 |               | all        |                   |       | 0.166 |            | myb-like DNA-binding domain                                                  |            |
| JpLpc11477p234  | 368            | 0.098 | 0.093 | -0.051 | 99        | 0.000 | 0.000 |        |               | species/Lp |                   |       | 0.075 |            | Tetratricopeptide repeat (TRP)/FKBP-type peptidyl-prolyl cis-trans isomerase |            |
| JpLpc15608p1838 | 337            | 0.151 | 0.140 | -0.082 |           |       |       |        |               | Lp         |                   | 3     |       | Positive   | Transducin family protein / WD-40 repeat family protein                      |            |
| JpLpc16915p385  | 368            | 0.111 | 0.105 | -0.059 | 99        | 0.182 | 0.166 | -0.100 |               | all        |                   |       | 0.056 |            | transcribed locus                                                            |            |
| JpLpc18130p528  | 368            | 0.171 | 0.175 | 0.018  | 99        | 0.152 | 0.158 | 0.035  |               | all        |                   |       | 0.26  |            | similar to Arabisopsis thaliana thaliana At5g13030                           |            |

| Locus           | Lodgepole pine |       |       |        | Jack pine |       |       |        | Linkage group | Data       | Outlier Detection |       |      | Introgress | Direction | Annotation                                                                      |
|-----------------|----------------|-------|-------|--------|-----------|-------|-------|--------|---------------|------------|-------------------|-------|------|------------|-----------|---------------------------------------------------------------------------------|
|                 | N              | Ho    | UHe   | F      | N         | Ho    | UHe   | F      |               |            | Species           | Lodge | Jack |            |           |                                                                                 |
| JpLpc21364p981  | 368            | 0.052 | 0.056 | 0.069  | 100       | 0.140 | 0.131 | -0.075 |               | all        | 1                 | 3     |      | 0          | Positive  | myb-like DNA binding domain                                                     |
| JpLpc21779p551  | 368            | 0.079 | 0.076 | -0.041 | 100       | 0.040 | 0.039 | -0.020 |               | all        | 1                 |       |      | 0.377      | Positive  | Rab5-interacting family protein                                                 |
| JpLpc23919p3213 | 367            | 0.384 | 0.424 | 0.092  | 100       | 0.030 | 0.030 | -0.015 |               | all        |                   |       |      | 0.811      |           | response regulator 2                                                            |
| JpLpc24416p627  | 368            | 0.008 | 0.008 | -0.004 | 100       | 0.460 | 0.474 | 0.024  |               | species/Jp |                   |       |      | 0          |           | HOPW1-1 interacting 1/aminotransferase class III                                |
| JpLpc24944p305  | 368            | 0.008 | 0.008 | -0.004 | 99        | 0.535 | 0.473 | -0.138 |               | species/Jp |                   |       |      | 0.011      |           | transcribed locus                                                               |
| JpLpc26435p293  | 368            | 0.484 | 0.501 | 0.032  | 100       | 0.060 | 0.058 | -0.031 |               | all        |                   |       |      | 0.26       |           | TATA-binding protein/cullin-associated and neddylation dissociated/HEAT repeats |
| JpLpc30315p463  | 367            | 0.305 | 0.299 | -0.022 | 100       | 0.000 | 0.000 |        |               | species/Lp |                   |       |      | 0.137      |           | basic pentacysteine 6/GAGA binding protein-like family                          |
| JpLpc30743p1175 | 368            | 0.168 | 0.163 | -0.032 | 100       | 0.370 | 0.382 | 0.026  |               | all        |                   |       |      | 0.563      |           | thylakoid lumenal P17.1 protein                                                 |
| JpLpc30808p665  | 368            | 0.011 | 0.011 | -0.005 | 97        | 0.371 | 0.341 | -0.094 |               | species/Jp | 1                 |       |      | 0.44       | Positive  | BTB/POZ domain and MATH domain 2                                                |
| JpLpc31632p126  | 363            | 0.325 | 0.347 | 0.062  | 100       | 0.320 | 0.284 | -0.134 |               | all        |                   |       |      | 0.31       |           | cystatin domain                                                                 |
| JpLpc31862p774  | 367            | 0.278 | 0.285 | 0.023  | 100       | 0.010 | 0.010 | -0.005 |               | species/Lp |                   |       |      | 0.432      |           | chalcone-flavanone isomerase                                                    |
| JpLpc31990p707  | 368            | 0.019 | 0.019 | -0.010 | 99        | 0.343 | 0.416 | 0.171  | JPL2          | all        |                   | 1     |      | 0.024      |           | homeobox 1                                                                      |
| JpLpc31990p90   | 368            | 0.027 | 0.027 | -0.014 | 100       | 0.460 | 0.495 | 0.067  | JPL2          | all        |                   | 1     |      | 0.021      |           | homeobox 1                                                                      |
| JpLpc32323p740  | 367            | 0.022 | 0.027 | 0.189  | 100       | 0.240 | 0.227 | -0.061 |               | all        | 1                 |       | 1    | 0.032      | Positive  | Aluminum induced protein with YGL and LRDR motifs                               |
| JpLpc32835p1047 | 368            | 0.457 | 0.475 | 0.037  | 100       | 0.060 | 0.058 | -0.031 |               | all        |                   |       |      | 0.337      |           | transcribed locus                                                               |
| JpLpc33893p239  | 368            | 0.016 | 0.016 | -0.008 | 100       | 0.070 | 0.104 | 0.327  |               | species/Jp | 3                 |       |      | 0.585      | Positive  | auxin-F-box protein 5                                                           |
| JpLpc34244p1745 | 365            | 0.890 | 0.495 | -0.800 | 98        | 0.459 | 0.431 | -0.071 |               | all        | 1                 |       |      | 0          | Negative  | Basic-leucine zipper transcription factor family protein                        |
| JpLpc34265p968  | 364            | 0.327 | 0.306 | -0.070 | 100       | 0.110 | 0.104 | -0.058 |               | all        |                   |       |      | 0          |           | F-box like family protein                                                       |
| JpLpc34784p179  | 367            | 0.044 | 0.043 | -0.022 | 99        | 0.455 | 0.456 | -0.001 |               | all        |                   |       |      | 0.995      |           | calreticulin family                                                             |
| JpLpc35530p946  | 358            | 0.310 | 0.313 | 0.009  | 99        | 0.182 | 0.183 | -0.001 |               | all        |                   |       |      | 0.082      |           | ethelene response factor                                                        |
| JpLpc36107p918  | 366            | 0.268 | 0.267 | -0.004 | 100       | 0.180 | 0.165 | -0.099 |               | all        |                   |       |      | 0.292      |           | transcribed locus                                                               |
| JpLpc36252p1327 | 368            | 0.082 | 0.078 | -0.042 | 100       | 0.020 | 0.020 | -0.010 |               | all        | 1                 |       |      | 0.002      | Positive  | histone chaperone/global transcription factor C                                 |
| JpLpc36728p680  | 366            | 0.115 | 0.108 | -0.061 | 100       | 0.560 | 0.490 | -0.149 |               | all        |                   |       |      | 0          |           | anitcondon-binding domain/RNA-processing                                        |
| JpLpc37132p434  | 336            | 0.467 | 0.464 | -0.008 | 100       | 0.000 | 0.000 |        |               | species/Lp |                   |       |      | 0          |           |                                                                                 |
| JpLpc37447p1264 | 368            | 0.011 | 0.011 | -0.005 | 100       | 0.530 | 0.484 | -0.100 |               | species/Jp |                   |       |      | 0.082      |           | Fcf2 pre-rRNA processing protein                                                |
| JpLpc38316p430  | 305            | 0.148 | 0.142 | -0.037 |           |       |       |        |               | Lp         |                   |       |      |            |           | sucrose-6F-phosphate synthase                                                   |
| JpLpc38375p1504 | 367            | 0.439 | 0.471 | 0.066  | 100       | 0.100 | 0.095 | -0.053 | LP10/Jp10     | all        |                   |       |      | 0.04       |           | homeodomain-like superfamily                                                    |
| JpLpc39429p214  | 368            | 0.163 | 0.177 | 0.076  | 99        | 0.071 | 0.069 | -0.037 |               | all        |                   |       |      | 0.23       |           | SIN3-like 4                                                                     |
| JpLpc39841p549  | 367            | 0.401 | 0.366 | -0.094 | 99        | 0.374 | 0.384 | 0.023  |               | all        |                   |       |      | 0.034      |           | similar to Arabisopsis thaliana At4g09830                                       |
| JpLpc39929p732  | 368            | 0.087 | 0.083 | -0.045 | 100       | 0.490 | 0.448 | -0.100 |               | all        |                   |       |      | 0.109      |           | SSXT family protein/translation elongation factor EF1A                          |
| JpLpc39993p867  | 368            | 0.033 | 0.037 | 0.126  | 100       | 0.210 | 0.189 | -0.117 |               | all        |                   | 1     |      | 0.062      |           | uncharacterized conserved protein (DUF2358)/Snoal-like domain                   |
| JpLpc39995p1987 | 368            | 0.030 | 0.029 | -0.015 | 100       | 0.520 | 0.486 | -0.075 | LP04/Jp11     | all        |                   |       |      | 0          |           | Telomerase activating protein Est1                                              |
| JpLpc40356p1400 | 367            | 0.302 | 0.287 | -0.057 | 97        | 0.031 | 0.031 | -0.016 |               | all        | 1                 |       |      | 0          | Negative  | inorganic H+ pyrophosphatase                                                    |
| JpLpc40793p1901 | 368            | 0.014 | 0.014 | -0.007 | 100       | 0.310 | 0.303 | -0.028 |               | species/Jp | 1                 |       |      | 0.062      | Positive  | Rtr1/RPAP2 family                                                               |
| JpLpc41024p554  | 368            | 0.071 | 0.068 | -0.037 |           |       |       |        |               | Lp         |                   |       |      |            |           | F-box family                                                                    |
| JpLpc41037p1156 | 368            | 0.378 | 0.374 | -0.011 | 100       | 0.010 | 0.010 | -0.005 |               | species/Lp |                   |       |      | 0.577      |           | TMPIT-like protein                                                              |
| JpLpc41319p340  | 368            | 0.027 | 0.032 | 0.153  | 100       | 0.030 | 0.049 | 0.385  |               | all        | 2                 | 1     |      | 0.992      | Positive  | uncharacterized BCR, YbaB family COG0718                                        |
| JpLpc42885p286  | 368            | 0.563 | 0.498 | -0.130 | 100       | 0.300 | 0.356 | 0.153  |               | all        |                   |       |      | 0.158      |           | DDRKG domain                                                                    |
| JpLpc44209p446  | 368            | 0.073 | 0.071 | -0.038 | 100       | 0.290 | 0.263 | -0.107 | LP11/Jp08     | all        | removed           |       |      | 0.22       |           | auxin response factor 1                                                         |
| JpLpc44494p452  | 366            | 0.019 | 0.019 | -0.010 | 100       | 0.560 | 0.502 | -0.122 |               | all        |                   | 1     |      | 0.053      |           | transcribed locus                                                               |
| JpLpc44713p1218 |                |       |       |        | 98        | 0.531 | 0.442 | -0.206 |               | Jp         |                   |       | 1    |            | Negative  | SEUSS-like 2                                                                    |
| JpLpc44713p1452 | 368            | 0.410 | 0.429 | 0.043  | 100       | 0.120 | 0.131 | 0.078  | LP07          | all        |                   |       |      | 0.016      |           | SEUSS-like 2                                                                    |
| JpLpc44782p470  | 368            | 0.022 | 0.022 | -0.011 | 100       | 0.320 | 0.297 | -0.084 |               | all        | 1                 | 2     |      | 0.335      | Positive  | KNOX1/2 domain/KNOTTED-like                                                     |

| Locus           | Lodgepole pine |       |       |        | Jack pine |       |       |        | Linkage group | Data       | Outlier Detection |       |      | Introgress | Direction | Annotation                                                                       |
|-----------------|----------------|-------|-------|--------|-----------|-------|-------|--------|---------------|------------|-------------------|-------|------|------------|-----------|----------------------------------------------------------------------------------|
|                 | N              | Ho    | UHe   | F      | N         | Ho    | UHe   | F      |               |            | Species           | Lodge | Jack |            |           |                                                                                  |
| JpLpc44961p330  | 368            | 0.429 | 0.426 | -0.009 | 99        | 0.525 | 0.494 | -0.069 |               | all        |                   |       |      |            | 0.735     | transcribed locus                                                                |
| JpLpc45225p571  | 368            | 0.043 | 0.043 | -0.022 | 99        | 0.202 | 0.183 | -0.112 | LP07          | all        | 1                 | 3     |      | Positive   | 0.002     | B-cell receptor-associated protein 31-like                                       |
| JpLpc45900p1071 | 368            | 0.476 | 0.473 | -0.007 | 95        | 0.032 | 0.031 | -0.016 |               | all        |                   |       |      |            | 0.527     | AP2 domain/integrase-type DNA-binding/eukaryotic translation initiation factor   |
| JpLpc47089p1628 | 368            | 0.486 | 0.445 | -0.095 | 100       | 0.050 | 0.049 | -0.026 |               | all        |                   |       |      |            | 0.422     | Dof-type zinc finger DNA-binding family protein                                  |
| JpLpc47089p1831 | 366            | 0.016 | 0.016 | -0.008 | 100       | 0.190 | 0.173 | -0.105 |               | species/Jp | 2                 |       | 1    | Positive   | 0.249     | Dof-type zinc finger DNA-binding family protein                                  |
| JpLpc47519p1846 | 367            | 0.008 | 0.008 | -0.004 | 100       | 0.200 | 0.212 | 0.053  |               | species/Jp |                   |       |      |            | 0.259     | ankyrin repeat family protein with DHHC zinc finger domain                       |
| JpLpc47519p2237 | 365            | 0.474 | 0.462 | -0.028 | 99        | 0.131 | 0.123 | -0.070 |               | all        |                   |       |      |            | 0.022     | ankyrin repeat family protein with DHHC zinc finger domain                       |
| JpLpc47778p1036 |                |       |       |        | 100       | 0.030 | 0.030 | -0.015 |               | Jp         |                   |       |      |            |           | chlorophyll A-B binding family protein                                           |
| JpLpc48195p543  | 366            | 0.505 | 0.501 | -0.011 | 100       | 0.060 | 0.058 | -0.031 |               | all        |                   |       |      |            | 0.342     | NAD(P)-binding Rossmann-fold superfamily protein/short chain dehydrogenase       |
| JpLpc48449p524  |                |       |       |        | 100       | 0.280 | 0.270 | -0.042 |               | Jp         |                   |       |      |            |           | transcribed locus                                                                |
| JpLpc49274p383  | 367            | 0.267 | 0.259 | -0.033 | 100       | 0.000 | 0.000 |        |               | species/Lp |                   |       |      |            | 0.015     | double-stranded DNA binding                                                      |
| JpLpc49873p886  | 368            | 0.003 | 0.003 | -0.001 | 100       | 0.480 | 0.499 | 0.034  | JP11          | species/Jp |                   |       |      |            | 0.234     | protein of unknown function (DUF1118)                                            |
| JpLpc50195p453  | 291            | 0.113 | 0.119 | 0.048  |           |       |       |        |               | Lp         |                   |       |      |            |           | complex I subunit                                                                |
| JpLpc50715p1991 | 368            | 0.033 | 0.032 | -0.017 | 100       | 0.470 | 0.494 | 0.044  |               | all        |                   |       |      |            | 0.012     | ubiquitin-like superfamily                                                       |
| JpLpc50903p425  | 368            | 0.005 | 0.005 | -0.003 | 100       | 0.390 | 0.434 | 0.096  |               | species/Jp |                   |       |      |            | 0.917     | transcribed locus                                                                |
| JpLpc54166p882  | 368            | 0.304 | 0.315 | 0.033  | 100       | 0.020 | 0.020 | -0.010 |               | all        |                   |       |      |            | 0.123     |                                                                                  |
| JpLpc54814p220  | 368            | 0.247 | 0.268 | 0.075  | 100       | 0.020 | 0.020 | -0.010 | LPL3          | all        |                   |       |      |            | 0         | basic helix-loop-helix (bHLH) DNA-binding superfamily protein                    |
| JpLpc54814p513  | 367            | 0.300 | 0.316 | 0.050  | 100       | 0.050 | 0.049 | -0.026 | LPL3          | all        |                   | 1     |      |            | 0.114     | basic helix-loop-helix (bHLH) DNA-binding superfamily protein                    |
| JpLpc56344p652  | 368            | 0.451 | 0.444 | -0.018 | 100       | 0.150 | 0.139 | -0.081 |               | all        |                   |       |      |            | 0.026     | cell elongation protein/DWARF 1/calmodulin binding                               |
| JpLpc57540p66   | 366            | 0.508 | 0.439 | -0.158 | 100       | 0.240 | 0.297 | 0.187  |               | all        |                   |       |      |            | 0         | RNA binding motif/dicer-like 1                                                   |
| JpLpc60957p494  | 368            | 0.470 | 0.473 | 0.004  | 100       | 0.110 | 0.104 | -0.058 |               | all        |                   |       |      |            | 0         | cysteine proteinases superfamily protein                                         |
| JpLpc61376p1097 | 368            | 0.386 | 0.408 | 0.054  | 100       | 0.010 | 0.010 | -0.005 |               | species/Lp |                   |       |      |            | 0.259     | protein kinase/mitogen-activated protein kinase                                  |
| JpLpc63491p915  | 368            | 0.019 | 0.019 | -0.010 | 100       | 0.240 | 0.256 | 0.059  |               | all        | 2                 | 1     |      | Positive   | 0.002     | cytokinin response factor/AP2 domain                                             |
| JpLpc65526p1833 | 368            | 0.473 | 0.490 | 0.034  | 100       | 0.040 | 0.039 | -0.020 |               | all        |                   |       |      |            | 0.108     | AP2 domain/integrase-type DNA-binding superfamily                                |
| JpLpc66545p1207 | 368            | 0.019 | 0.019 | -0.010 | 99        | 0.081 | 0.078 | -0.042 |               | all        | 2                 |       | 1    | Positive   | 0.02      | transcribed locus                                                                |
| JpLpc66974p221  | 365            | 0.438 | 0.453 | 0.030  | 100       | 0.550 | 0.448 | -0.234 |               | all        | 1                 |       |      | Negative   | 0.048     | enhanced downy mildew 2 (EDM2)                                                   |
| JpLpc68435p382  | 367            | 0.510 | 0.494 | -0.033 | 100       | 0.050 | 0.049 | -0.026 |               | all        |                   |       |      |            | 0.661     | Acyl-CoA N-acyltransferases superfamily protein                                  |
| JpLpc71773p809  | 365            | 0.471 | 0.500 | 0.057  | 99        | 0.465 | 0.440 | -0.062 |               | all        |                   |       |      |            | 0.166     | ribosomal protein L18ae family                                                   |
| JpLpc72416p369  | 364            | 0.349 | 0.377 | 0.073  | 100       | 0.020 | 0.020 | -0.010 |               | all        |                   |       |      |            | 0.037     | ARF-GAP domain 8/putative GTPase activating protein for Arf                      |
| JpLpc72792p1173 | 367            | 0.033 | 0.048 | 0.317  |           |       |       |        | LP12          | Lp         |                   | 1     |      |            |           | polyketide cyclase/dehydrase and lipid transport superfamily/START_STARD2_7 like |
| JpLpc73084p710  |                |       |       |        | 100       | 0.360 | 0.345 | -0.049 |               | Jp         |                   |       |      |            |           | phytochrome-associated protein phosphatase type 2C                               |
| JpLpc74417p752  | 367            | 0.534 | 0.497 | -0.077 |           |       |       |        |               | Lp         |                   |       |      |            |           | Protein of unknown function (DUF2488)                                            |
| JpLpc74576p546  | 368            | 0.003 | 0.003 | -0.001 | 100       | 0.220 | 0.227 | 0.027  |               | species/Jp |                   |       |      |            | 0.309     | transcribed locus                                                                |
| JpLpc75275p653  | 368            | 0.098 | 0.113 | 0.130  | 100       | 0.530 | 0.401 | -0.329 |               | all        |                   |       |      |            | 0         | transcribed locus                                                                |
| JpLpc75741p1236 | 368            | 0.489 | 0.486 | -0.009 | 100       | 0.100 | 0.095 | -0.053 |               | all        |                   |       |      |            | 0.229     | kinase related protein of unknown functin                                        |
| JpLpc79147p1879 | 368            | 0.063 | 0.061 | -0.032 | 100       | 0.090 | 0.104 | 0.134  |               | all        | 1                 | 1     |      | Positive   | 0.45      | transcribed locus                                                                |
| JpLpc79197p531  | 368            | 0.497 | 0.493 | -0.011 | 100       | 0.070 | 0.068 | -0.036 | LP10/JP10     | all        |                   |       | 1    |            | 0.286     | homolog of anti-oxidant 1/heavy-metal associated domain/copper chaperone         |
| JpLpc79522p772  |                |       |       |        | 83        | 0.434 | 0.414 | -0.055 |               | Jp         |                   |       |      |            |           | transcribed locus                                                                |
| JpLpc79566p1158 | 368            | 0.514 | 0.500 | -0.029 | 100       | 0.200 | 0.181 | -0.111 |               | all        |                   |       |      |            | 0.164     | transcribed locus                                                                |
| JpLpc80697p862  | 368            | 0.465 | 0.501 | 0.070  | 100       | 0.400 | 0.345 | -0.166 |               | all        |                   |       |      |            | 0.002     | AWPM-19 family (membrane)/ peptidoglycan-binding LysM domain-containing          |
| JpLpc82733p437  | 365            | 0.496 | 0.499 | 0.004  | 100       | 0.020 | 0.020 | -0.010 |               | all        |                   |       |      |            | 0.031     | basic transcription factor 3/NAC domain                                          |
| JpLpc82733p81   | 366            | 0.005 | 0.005 | -0.003 | 100       | 0.550 | 0.502 | -0.101 |               | species/Jp |                   |       |      |            | 0.015     | basic transcription factor 3/NAC domain                                          |
| JpLpc85542p1333 |                |       |       |        | 94        | 0.468 | 0.458 | -0.027 |               | Jp         |                   |       |      |            |           | geranylgeranyl pyrophosphate synthase 1                                          |

| Locus          | Lodgepole pine |       |       |        | Jack pine |       |       |        | Linkage group | Data       | Outlier Detection |       |       | Introgress | Direction                                                                      | Annotation |
|----------------|----------------|-------|-------|--------|-----------|-------|-------|--------|---------------|------------|-------------------|-------|-------|------------|--------------------------------------------------------------------------------|------------|
|                | N              | Ho    | UHe   | F      | N         | Ho    | UHe   | F      |               |            | Species           | Lodge | Jack  |            |                                                                                |            |
| JpLpc86157p398 | 367            | 0.161 | 0.166 | 0.031  | 100       | 0.090 | 0.086 | -0.047 | JPLP2         | all        | 1                 | 1     | 0.169 | Positive   | RNA recognition motif/SC35-like splicing factor 28                             |            |
| JpLpc86157p76  | 340            | 0.179 | 0.178 | -0.010 | 99        | 0.091 | 0.087 | -0.048 | JPLP2         | all        | 1                 | 1     | 0.289 | Positive   | RNA recognition motif/SC35-like splicing factor 28                             |            |
| Lodgc103p389   | 368            | 0.467 | 0.426 | -0.098 | 100       | 0.210 | 0.220 | 0.040  |               | all        |                   |       | 0.039 |            | 4-hydroxy-3-methylbut-2-enyl diphosphate reductase                             |            |
| Lodgc1040p150  | 368            | 0.117 | 0.129 | 0.094  | 100       | 0.010 | 0.010 | -0.005 |               | species/Lp |                   |       | 0.221 |            | ADR1-like/leucine rich repeat/NB-ARC domain                                    |            |
| Lodgc1065p551  | 368            | 0.052 | 0.050 | -0.026 |           |       |       |        |               | Lp         |                   |       |       |            | ubiquitin-specific protease 13                                                 |            |
| Lodgc1073p453  | 367            | 0.360 | 0.371 | 0.028  | 100       | 0.010 | 0.010 | -0.005 |               | species/Lp |                   |       | 0.402 |            | glutamyl-tRNA reductase family protein                                         |            |
| Lodgc1087p211  | 368            | 0.239 | 0.270 | 0.112  | 100       | 0.000 | 0.000 |        | LP13          | species/Lp | 1                 | 3     | 0.005 | Positive   | proteasome alpha type 7                                                        |            |
| Lodgc1092p492  | 363            | 0.267 | 0.267 | -0.002 | 100       | 0.010 | 0.010 | -0.005 |               | species/Lp |                   |       | 0.068 |            | zinc-binding dehydrogenase/oxidoreductase                                      |            |
| Lodgc1110p421  | 368            | 0.408 | 0.426 | 0.042  | 100       | 0.050 | 0.049 | -0.026 |               | all        |                   |       | 0.002 |            | NAC domain containing protein 71                                               |            |
| Lodgc1141p278  | 363            | 0.215 | 0.254 | 0.152  | 100       | 0.000 | 0.000 |        |               | species/Lp |                   |       | 0.042 |            | DnaJ homolog 3                                                                 |            |
| Lodgc118p350   | 365            | 0.427 | 0.467 | 0.083  | 100       | 0.010 | 0.010 | -0.005 | LP13          | species/Lp | 2                 | 3     | 0     | Positive   | sedoheptulose-bisphosphate/fructose-1-6-bisphosphate - chloroplast like        |            |
| Lodgc1193p223  | 365            | 0.323 | 0.304 | -0.066 | 100       | 0.010 | 0.010 | -0.005 |               | species/Lp |                   |       | 0.069 |            | transcribed locus                                                              |            |
| Lodgc1214p281  | 366            | 0.363 | 0.337 | -0.078 | 100       | 0.000 | 0.000 |        |               | species/Lp |                   |       | 0.239 |            | delta subunit of Mt ATP synthase                                               |            |
| Lodgc123p319   | 368            | 0.337 | 0.331 | -0.018 | 100       | 0.010 | 0.010 | -0.005 |               | species/Lp |                   |       | 0.983 |            | LSD1 like zinc finger                                                          |            |
| Lodgc1249p448  | 302            | 0.487 | 0.412 | -0.183 |           |       |       |        |               | Lp         |                   |       |       |            | pyruvate phosphate dikinase/pyruvate binding domain                            |            |
| Lodgc1316p295  | 362            | 0.276 | 0.291 | 0.051  |           |       |       |        |               | Lp         |                   |       |       |            | adolase superfamily protein/fructose-bisphosphate adolase class I              |            |
| Lodgc1407p248  | 324            | 0.043 | 0.111 | 0.609  | 100       | 0.000 | 0.000 |        |               | species/Lp |                   |       | 0     |            | stress-inducible protein, putative/sialyltransferase family protein            |            |
| Lodgc1490p507  | 368            | 0.057 | 0.056 | -0.029 |           |       |       |        |               | Lp         |                   |       |       |            | ubiquinol cytochrome reductase transmembrane region/iron-sulfur subunit        |            |
| Lodgc1496p263  | 368            | 0.144 | 0.148 | 0.023  | 100       | 0.000 | 0.000 |        |               | species/Lp |                   |       | 0.369 |            | beta-ketoacyl reductase/KR domain/short chain dehydrogenase                    |            |
| Lodgc1562p404  | 368            | 0.486 | 0.493 | 0.011  | 100       | 0.030 | 0.030 | -0.015 |               | all        |                   |       | 0.63  |            | fibrillin family protein/Plastid-lipid associated protein PAP                  |            |
| Lodgc157p477   | 352            | 0.134 | 0.154 | 0.131  | 100       | 0.020 | 0.020 | -0.010 |               | all        |                   |       | 0.01  |            | adenosylmethionine decarboxylase                                               |            |
| Lodgc15p411    | 366            | 0.369 | 0.370 | 0.002  | 100       | 0.260 | 0.270 | 0.033  |               | all        |                   |       | 0.009 |            | YGGT family protein                                                            |            |
| Lodgc1623p352  | 365            | 0.299 | 0.302 | 0.009  |           |       |       |        |               | Lp         |                   |       |       |            | B-box type zinc finger protein with CCT domain                                 |            |
| Lodgc1794p389  | 360            | 0.422 | 0.431 | 0.020  | 100       | 0.450 | 0.392 | -0.155 |               | all        |                   |       | 0.177 |            | 4-coumarate-CoA ligase enzyme (PT4CL1)                                         |            |
| Lodgc1891p418  | 368            | 0.283 | 0.284 | 0.004  | 100       | 0.580 | 0.482 | -0.208 |               | all        |                   |       | 0.04  |            | transcribed locus                                                              |            |
| Lodgc189p276   | 367            | 0.267 | 0.244 | -0.098 | 100       | 0.010 | 0.010 | -0.005 |               | species/Lp |                   |       | 0.083 |            | ATP-citrate synthase                                                           |            |
| Lodgc1909p373  | 365            | 0.255 | 0.277 | 0.079  | 100       | 0.110 | 0.104 | -0.058 |               | all        |                   |       | 0.519 |            | beta-ketoacyl synthase, N-terminal domain/fatty acid biosynthesis 1            |            |
| Lodgc1931p524  | 368            | 0.277 | 0.277 | -0.002 | 100       | 0.020 | 0.020 | -0.010 |               | all        |                   |       | 0.021 |            | transcribed locus                                                              |            |
| Lodgc2047p463  | 368            | 0.546 | 0.494 | -0.108 | 100       | 0.380 | 0.333 | -0.145 |               | all        |                   |       | 0.058 |            | helix-loop-helix DNA binding domain                                            |            |
| Lodgc2049p390  | 368            | 0.215 | 0.221 | 0.028  | 100       | 0.010 | 0.010 | -0.005 |               | species/Lp |                   |       | 0.634 |            | RING/U-box superfamily protein                                                 |            |
| Lodgc218p506   | 367            | 0.112 | 0.115 | 0.029  | 100       | 0.000 | 0.000 |        |               | species/Lp |                   | 1     | 0.126 | Negative   | transcribed locus                                                              |            |
| Lodgc2226p408  | 366            | 0.372 | 0.354 | -0.051 | 100       | 0.330 | 0.328 | -0.012 |               | all        |                   |       | 0.334 |            | IQ calmodulin-binding motif                                                    |            |
| Lodgc2304p514  | 367            | 0.240 | 0.274 | 0.123  | 100       | 0.010 | 0.010 | -0.005 | LP14          | species/Lp | 1                 | 3     | 0.24  | Positive   | triosephosphate isomerase                                                      |            |
| Lodgc2347p440  | 358            | 0.263 | 0.233 | -0.131 | 98        | 0.429 | 0.492 | 0.125  | JP12          | all        |                   |       | 0.497 |            | serine-rich protein-related                                                    |            |
| Lodgc2413p445  | 368            | 0.111 | 0.120 | 0.068  | 99        | 0.000 | 0.000 |        |               | species/Lp |                   | 1     | 0.02  |            | histone deacetylase                                                            |            |
| Lodgc2449p408  | 366            | 0.189 | 0.197 | 0.042  | 100       | 0.110 | 0.104 | -0.058 |               | all        |                   |       | 0.118 |            | membrane-associated mannitol-induced                                           |            |
| Lodgc2458p469  |                |       |       |        | 100       | 0.280 | 0.270 | -0.042 |               | Jp         |                   |       |       |            | CLP protease                                                                   |            |
| Lodgc2485p527  | 367            | 0.428 | 0.465 | 0.079  | 100       | 0.440 | 0.469 | 0.056  |               | all        |                   |       | 0.705 |            | transcribed locus                                                              |            |
| Lodgc2532p1120 | 368            | 0.492 | 0.489 | -0.006 | 100       | 0.050 | 0.049 | -0.026 |               | all        |                   |       | 0.081 |            | Ras family/miro-like protein/signal recognition particle receptor beta subunit |            |
| Lodgc2606p320  | 367            | 0.180 | 0.182 | 0.008  | 100       | 0.190 | 0.173 | -0.105 | JP13          | all        |                   |       | 0.003 |            | ADP-ribosylation factor family/G protein alpha subunit                         |            |
| Lodgc2627p673  | 367            | 0.471 | 0.497 | 0.050  | 100       | 0.080 | 0.077 | -0.042 |               | all        |                   |       | 0.357 |            | 2-oxoglutarate (2OG) and Fe(II) dependent oxygenase superfamily protein        |            |
| Lodgc2649p345  | 368            | 0.117 | 0.120 | 0.023  | 100       | 0.010 | 0.010 | -0.005 |               | species/Lp |                   |       | 0.388 |            | thioredoxin                                                                    |            |
| Lodgc2743p497  | 359            | 0.223 | 0.244 | 0.086  | 100       | 0.030 | 0.030 | -0.015 |               | all        |                   |       | 0.007 |            | eIF4-gamma/ARM repeat superfamily protein                                      |            |

| Locus         | Lodgepole pine |       |       |        | Jack pine |       |       |        | Linkage group | Data       | Outlier Detection |       |       | Introgress | Direction                                                                                 | Annotation |
|---------------|----------------|-------|-------|--------|-----------|-------|-------|--------|---------------|------------|-------------------|-------|-------|------------|-------------------------------------------------------------------------------------------|------------|
|               | N              | Ho    | UHe   | F      | N         | Ho    | UHe   | F      |               |            | Species           | Lodge | Jack  |            |                                                                                           |            |
| Lodgc2792p662 | 366            | 0.448 | 0.496 | 0.095  | 98        | 0.235 | 0.253 | 0.069  |               | all        |                   |       | 0.184 |            |                                                                                           |            |
| Lodgc2798p514 | 368            | 0.486 | 0.467 | -0.042 | 100       | 0.010 | 0.010 | -0.005 |               | species/Lp |                   |       | 0.193 |            | rhamnose biosynthesis 1/polysaccharide biosynthesis/NAD dependent epimerase               |            |
| Lodgc2800p195 | 367            | 0.158 | 0.146 | -0.086 | 100       | 0.000 | 0.000 |        |               | species/Lp |                   |       | 0.67  |            | myb-like DNA-binding domain                                                               |            |
| Lodgc2828p334 | 367            | 0.365 | 0.353 | -0.034 | 100       | 0.010 | 0.010 | -0.005 |               | species/Lp |                   |       | 0.177 |            | polysaccharide biosynthesis/NAD dependent epimerase/dyhydroflavonol 4-reductase           |            |
| Lodgc3011p422 | 314            | 0.643 | 0.499 | -0.291 |           |       |       |        |               | Lp         |                   |       |       |            | elongation factor                                                                         |            |
| Lodgc3248p281 |                |       |       |        | 85        | 0.024 | 0.023 | -0.012 |               | Jp         |                   |       |       |            | protein kinase/tyrosine superfamily protein                                               |            |
| Lodgc3290p342 | 356            | 0.292 | 0.292 | -0.003 | 100       | 0.000 | 0.000 |        |               | species/Lp |                   |       | 0.032 |            | photosystem II reaction center PSB28 protein                                              |            |
| Lodgc3293p323 | 364            | 0.503 | 0.481 | -0.048 | 100       | 0.020 | 0.020 | -0.010 |               | all        |                   |       | 0.654 |            | Tetratricopeptide repeat (TRP) superfamily protein                                        |            |
| Lodgc3482p180 | 366            | 0.527 | 0.485 | -0.089 | 100       | 0.000 | 0.000 |        |               | species/Lp |                   |       | 0.59  |            | RAN GTPase 3/RNA helicase/miro-like protein/Ras family                                    |            |
| Lodgc348p360  | 368            | 0.516 | 0.482 | -0.074 | 99        | 0.040 | 0.040 | -0.021 |               | all        |                   |       | 0.187 |            | glutamate:glyoxylate aminotransferase                                                     |            |
| Lodgc389p393  | 367            | 0.319 | 0.337 | 0.052  | 99        | 0.030 | 0.030 | -0.015 |               | all        |                   |       | 0.002 |            | dehydrin                                                                                  |            |
| Lodgc408p638  | 367            | 0.267 | 0.251 | -0.064 | 100       | 0.030 | 0.030 | -0.015 |               | all        |                   |       | 0.006 |            | IQ calmodulin-binding motif                                                               |            |
| Lodgc4104p268 | 358            | 0.849 | 0.501 | -0.699 | 100       | 0.200 | 0.197 | -0.021 |               | all        |                   |       | 0     |            | purine biosynthesis 4                                                                     |            |
| Lodgc415p436  | 367            | 0.256 | 0.278 | 0.076  | 100       | 0.000 | 0.000 |        |               | species/Lp |                   |       | 0.072 |            | ribosomal protein 1/L3                                                                    |            |
| Lodgc4293p449 | 368            | 0.141 | 0.131 | -0.076 | 100       | 0.000 | 0.000 |        |               | species/Lp |                   |       | 0.341 |            | trypsin family protein                                                                    |            |
| Lodgc4306p424 | 366            | 0.467 | 0.475 | 0.015  | 100       | 0.280 | 0.309 | 0.090  |               | all        |                   |       | 0.012 |            | nucleotide-diphospho-sugar transferases superfamily                                       |            |
| Lodgc4405p428 | 368            | 0.212 | 0.219 | 0.031  | 100       | 0.010 | 0.010 | -0.005 |               | species/Lp |                   |       | 0.014 |            | peroxin 14/peroxisomal membrane anchor protein                                            |            |
| Lodgc4407p669 | 368            | 0.266 | 0.277 | 0.037  | 100       | 0.060 | 0.058 | -0.031 |               | all        |                   | 1     | 0.042 |            | PGRS-like                                                                                 |            |
| Lodgc4455p208 | 367            | 0.436 | 0.414 | -0.055 | 99        | 0.455 | 0.501 | 0.088  |               | all        | 1                 |       | 0.318 | Negative   | Plant protein of unknown function (DUF868)                                                |            |
| Lodgc447p278  | 367            | 0.447 | 0.356 | -0.255 |           |       |       |        | LP12          | Lp         |                   |       |       |            | actin depolymerizing factor/tropomyosin-type actin-binding protein                        |            |
| Lodgc4517p609 | 334            | 0.368 | 0.369 | 0.002  |           |       |       |        |               | Lp         |                   |       |       |            | protein tyrosine phosphatase                                                              |            |
| Lodgc469p206  | 357            | 0.353 | 0.372 | 0.050  | 99        | 0.000 | 0.000 |        |               | species/Lp |                   |       | 0.002 |            | cysteine proteinases/cathepsin propeptide inhibitor domain/papain cysteine protease       |            |
| Lodgc478p476  | 367            | 0.153 | 0.164 | 0.068  | 100       | 0.320 | 0.333 | 0.036  |               | all        | 1                 |       | 0.012 | Negative   | alpha/beta hydrolase family                                                               |            |
| Lodgc4922p383 | 368            | 0.505 | 0.499 | -0.014 | 100       | 0.090 | 0.104 | 0.134  |               | all        |                   |       | 0.588 |            | 2-oxoglutarate (2OG) and Fe(II) dependent oxygenase superfamily protein                   |            |
| Lodgc5121p406 | 367            | 0.376 | 0.402 | 0.063  | 100       | 0.020 | 0.020 | -0.010 |               | all        |                   |       | 0.19  |            | Protein of unknown function (DUF1218)                                                     |            |
| Lodgc5297p86  | 367            | 0.150 | 0.143 | -0.046 | 100       | 0.330 | 0.466 | 0.288  | JP12          | all        |                   |       | 0.649 |            | RING 1A                                                                                   |            |
| Lodgc5447p89  | 368            | 0.288 | 0.288 | -0.002 | 100       | 0.020 | 0.020 | -0.010 |               | all        |                   |       | 0.983 |            | Alba DNA/RNA binding protein                                                              |            |
| Lodgc5453p480 | 368            | 0.239 | 0.235 | -0.018 | 100       | 0.270 | 0.290 | 0.065  |               | all        | 2                 |       | 0.118 | Negative   | nodulin-like/major facilitator superfamily protein                                        |            |
| Lodgc5567p169 | 368            | 0.188 | 0.175 | -0.076 | 100       | 0.000 | 0.000 |        |               | species/Lp |                   |       | 0.085 |            | photosystem I reaction centre (PSAN or PSI-N)                                             |            |
| Lodgc5620p213 | 363            | 0.171 | 0.201 | 0.148  |           |       |       |        |               | Lp         |                   |       |       |            | dormancy-auxin associated protein/heat shock protein                                      |            |
| Lodgc5646p131 | 360            | 0.136 | 0.127 | -0.073 | 91        | 0.066 | 0.085 | 0.216  |               | all        |                   |       | 0     |            | ARM repeat superfamily protein                                                            |            |
| Lodgc570p462  | 368            | 0.101 | 0.105 | 0.044  | 100       | 0.000 | 0.000 |        |               | species/Lp |                   |       | 0.765 |            | similar to ewsr1b                                                                         |            |
| Lodgc576p498  | 367            | 0.324 | 0.327 | 0.008  | 100       | 0.070 | 0.068 | -0.036 |               | all        |                   |       | 0.329 |            | cysteine-rich receptor like protein kinase/similar to copia protein (gag-int-pol protein) |            |
| Lodgc6047p607 | 366            | 0.139 | 0.135 | -0.037 | 100       | 0.120 | 0.113 | -0.064 | LP06          | all        | 1                 |       | 0.672 | Negative   | ACD1-like                                                                                 |            |
| Lodgc623p588  | 368            | 0.266 | 0.315 | 0.154  | 100       | 0.010 | 0.010 | -0.005 |               | species/Lp |                   |       | 0.649 |            | lactate/malate dehydrogenase, NAD binding domain                                          |            |
| Lodgc6246p531 | 368            | 0.291 | 0.293 | 0.006  | 100       | 0.020 | 0.020 | -0.010 |               | all        |                   |       | 0.671 |            | peroxin 22                                                                                |            |
| Lodgc624p1141 | 368            | 0.410 | 0.398 | -0.033 | 100       | 0.020 | 0.020 | -0.010 |               | all        |                   |       | 0.974 |            | chloroplast sulphur E/Fe-S metabolism associated domain                                   |            |
| Lodgc642p886  | 366            | 0.503 | 0.459 | -0.098 | 100       | 0.010 | 0.010 | -0.005 |               | species/Lp |                   |       | 0.087 |            | GATA type zinc finger transcription factor family protein                                 |            |
| Lodgc6501p370 | 352            | 0.608 | 0.494 | -0.232 |           |       |       |        |               | Lp         |                   |       |       |            | Annexin                                                                                   |            |
| Lodgc6505p421 | 368            | 0.261 | 0.247 | -0.058 | 100       | 0.430 | 0.401 | -0.078 |               | all        |                   |       | 0.911 |            | RING/U-box superfamily protein                                                            |            |
| Lodgc654p579  | 365            | 0.312 | 0.320 | 0.024  | 100       | 0.020 | 0.020 | -0.010 |               | all        |                   |       | 0.66  |            | cupin domain/1,2-dihydroxy-3-keto-5-methylthiopentene dioxygenase                         |            |
| Lodgc6568p554 | 368            | 0.329 | 0.366 | 0.100  | 100       | 0.100 | 0.131 | 0.232  | JP09          | all        |                   | 2     | 0.01  |            | flavanone 3-hydroxylase                                                                   |            |
| Lodgc6868p131 | 368            | 0.367 | 0.354 | -0.037 | 100       | 0.080 | 0.095 | 0.158  |               | all        |                   |       | 0.046 |            | Drought-responsive family protein                                                         |            |



| Locus          | Lodgepole pine |       |       |        | Jack pine |       |       |        | Linkage group | Data       | Outlier Detection |       |       | Introgress | Direction                                                                        | Annotation |
|----------------|----------------|-------|-------|--------|-----------|-------|-------|--------|---------------|------------|-------------------|-------|-------|------------|----------------------------------------------------------------------------------|------------|
|                | N              | Ho    | UHe   | F      | N         | Ho    | UHe   | F      |               |            | Species           | Lodge | Jack  |            |                                                                                  |            |
| Lodgc7085p286  | 366            | 0.385 | 0.378 | -0.020 | 100       | 0.040 | 0.039 | -0.020 |               | all        |                   |       | 0.15  |            | Peptidase M76 family/Ku70-binding protein                                        |            |
| Lodgc7446p377  | 365            | 0.523 | 0.491 | -0.068 | 100       | 0.010 | 0.010 | -0.005 |               | species/Lp |                   |       | 0.674 |            | flavin-binding monooxygenase family protein                                      |            |
| Lodgc758p388   | 368            | 0.226 | 0.241 | 0.063  | 100       | 0.000 | 0.000 |        |               | species/Lp |                   |       | 0.367 |            | 2-phosphoglycolate phosphatase 1                                                 |            |
| Lodgc7681p243  | 361            | 0.363 | 0.489 | 0.256  |           |       |       |        |               | Lp         |                   |       |       |            | cytochrome B5 isoform B                                                          |            |
| Lodgc792p190   | 368            | 0.207 | 0.215 | 0.038  | 100       | 0.020 | 0.020 | -0.010 |               | all        |                   |       | 0.043 |            | 4-aminobutyrate transaminase/pyridoxal phosphate dependent transferases          |            |
| Lodgc889p498   | 368            | 0.465 | 0.489 | 0.049  | 100       | 0.030 | 0.030 | -0.015 |               | all        |                   |       | 0.001 |            | UDP-glucose/GDP-mannose dehydrogenase family UDP binding domain                  |            |
| Lodgc910p162   | 336            | 0.420 | 0.380 | -0.106 | 91        | 0.011 | 0.011 | -0.006 |               | species/Lp |                   |       | 0.191 |            | glutamate decarboxylase/pyridoxal-dependent                                      |            |
| Lodgc914p496   | 368            | 0.139 | 0.134 | -0.037 | 100       | 0.000 | 0.000 |        |               | species/Lp |                   |       | 0.862 |            | tetraspanin family                                                               |            |
| Lodgc978p318   | 367            | 0.436 | 0.423 | -0.033 | 100       | 0.550 | 0.491 | -0.125 | JP05          | all        |                   |       | 0.002 |            | phosphoglycerate kinase                                                          |            |
| Lp_c00150p459  | 367            | 0.014 | 0.014 | -0.007 | 100       | 0.130 | 0.173 | 0.244  |               | species/Jp | 2                 |       | 0.353 | Positive   | circadian clock associated 1                                                     |            |
| Lp_c00150p61   | 368            | 0.351 | 0.345 | -0.017 | 100       | 0.020 | 0.020 | -0.010 |               | all        |                   |       | 0.011 |            | circadian clock associated 1                                                     |            |
| Lp_c00228p801  | 362            | 0.533 | 0.495 | -0.079 | 100       | 0.460 | 0.501 | 0.077  |               | all        |                   |       | 0.577 |            | ribosomal protein L19 family                                                     |            |
| Lp_c00318p734  | 368            | 0.342 | 0.364 | 0.059  | 100       | 0.110 | 0.122 | 0.095  |               | all        |                   |       | 0.262 |            | phosphofruktokinase family protein                                               |            |
| Lp_c00579p455  | 362            | 0.434 | 0.473 | 0.082  | 100       | 0.030 | 0.030 | -0.015 |               | all        |                   |       | 0.002 |            | AUX/IAA family                                                                   |            |
| Lp_c00925p827  | 367            | 0.253 | 0.238 | -0.068 | 100       | 0.010 | 0.010 | -0.005 |               | species/Lp |                   |       | 0.546 |            | calcineurin-like metallo-phosphoesterase superfamily protein                     |            |
| Lp_c00983p1180 | 367            | 0.354 | 0.376 | 0.057  | 100       | 0.520 | 0.499 | -0.047 |               | all        | 1                 |       | 0.271 | Negative   | tetratricopeptide repeat like/basic-leucine zipper transcription factor          |            |
| Lp_c01140p845  | 366            | 0.262 | 0.244 | -0.076 | 100       | 0.000 | 0.000 |        |               | species/Lp |                   |       | 0.133 |            | tetratricopeptide repeat                                                         |            |
| Lp_c01467p496  | 368            | 0.147 | 0.150 | 0.020  | 100       | 0.120 | 0.113 | -0.064 |               | all        | 1                 |       | 0     | Negative   | protein of unknown function (DUF538)                                             |            |
| Lp_c01502p915  | 354            | 0.506 | 0.495 | -0.022 | 94        | 0.340 | 0.360 | 0.051  |               | all        |                   |       | 0.003 |            | calcineurin-like metallo-phosphoesterase superfamily protein                     |            |
| Lp_c01813p1225 | 367            | 0.240 | 0.228 | -0.055 | 100       | 0.020 | 0.020 | -0.010 |               | all        |                   | 1     | 0.299 |            | biotin/lipoyl attachment domain-containing protein                               |            |
| Lp_c02035p862  | 368            | 0.416 | 0.425 | 0.021  | 100       | 0.050 | 0.049 | -0.026 |               | all        |                   |       | 0.341 |            | protein containing PDZ domain, K-box domain, and TPR region                      |            |
| Lp_c02191p296  | 368            | 0.492 | 0.498 | 0.012  | 100       | 0.030 | 0.030 | -0.015 | LPL4          | all        |                   |       | 0.917 |            | transketolase                                                                    |            |
| Lp_c02191p997  | 368            | 0.277 | 0.277 | -0.002 | 100       | 0.010 | 0.010 | -0.005 | LPL4          | species/Lp |                   |       | 0.71  |            | transketolase                                                                    |            |
| Lp_c02598p1040 | 316            | 0.481 | 0.464 | -0.039 |           |       |       |        |               | Lp         |                   |       |       |            | similar to Arabisopsis thaliana At1g62780                                        |            |
| Lp_c02648p549  | 314            | 0.484 | 0.492 | 0.014  |           |       |       |        |               | Lp         |                   |       |       |            | GHMP kinase family protein                                                       |            |
| Lp_c02821p599  |                |       |       |        | 98        | 0.459 | 0.459 | -0.007 |               | Jp         |                   |       |       |            | protein kinase superfamily protein                                               |            |
| Lp_c03449p321  | 368            | 0.427 | 0.492 | 0.131  | 100       | 0.010 | 0.010 | -0.005 |               | species/Lp |                   |       | 0.214 |            | B-Box type zinc-finger like protein                                              |            |
| Lp_c04005p661  | 363            | 0.854 | 0.491 | -0.742 | 99        | 0.010 | 0.010 | -0.005 |               | species/Lp |                   |       | 0     |            | xyloglucan endo-transglycosylase                                                 |            |
| Lp_c04005p977  | 364            | 0.473 | 0.485 | 0.025  | 100       | 0.010 | 0.010 | -0.005 |               | species/Lp |                   |       | 0.005 |            | xyloglucan endo-transglycosylase                                                 |            |
| Lp_c04157p375  | 368            | 0.239 | 0.227 | -0.054 | 100       | 0.000 | 0.000 |        |               | species/Lp |                   |       | 0.1   |            | endoplasmic reticulum vesicle transporter                                        |            |
| Lp_c04318p2154 | 368            | 0.207 | 0.215 | 0.038  | 100       | 0.000 | 0.000 |        | LP14          | species/Lp | 3                 |       | 0.267 | Positive   | carbohydrate binding molecule/starch branching enzyme 2.2                        |            |
| Lp_c04466p3014 | 346            | 0.486 | 0.459 | -0.060 |           |       |       |        |               | Lp         |                   |       |       |            | transducin/WD-40 repeat-like superfamily                                         |            |
| Lp_c04493p319  | 366            | 0.462 | 0.494 | 0.064  | 100       | 0.040 | 0.058 | 0.313  |               | all        |                   |       | 0.087 |            | magnesium transporter                                                            |            |
| Lp_c05328p985  | 368            | 0.375 | 0.381 | 0.014  | 100       | 0.190 | 0.189 | -0.011 |               | all        |                   |       | 0.679 |            | phosphogluconate dehydrogenase/glyoxylate reductase 1                            |            |
| Lp_c07286p308  | 367            | 0.433 | 0.406 | -0.070 | 100       | 0.280 | 0.242 | -0.163 |               | all        |                   |       | 0.115 |            | chloroplast stem-loop binding protein/NAD dependent epimerase/dehydratase family |            |
| Lp_c07630p326  | 368            | 0.519 | 0.493 | -0.054 | 100       | 0.330 | 0.316 | -0.051 |               | all        |                   |       | 0.503 |            | pectin lyase-like superfamily protein/glycosyl hydrolases family 28              |            |
| Lp_c07997p838  | 365            | 0.515 | 0.484 | -0.066 | 100       | 0.050 | 0.049 | -0.026 |               | all        |                   |       | 0.27  |            | cobalamin synthesis/plastid transcriptionally active 17                          |            |
| Lp_c08410p197  | 367            | 0.455 | 0.466 | 0.023  | 100       | 0.040 | 0.039 | -0.020 |               | all        |                   | 1     | 0.115 |            | proteasome beta subunit                                                          |            |
| Lp_c09201p186  | 366            | 0.396 | 0.394 | -0.007 | 99        | 0.020 | 0.020 | -0.010 | LPL5          | all        |                   |       | 0.988 |            | ATP synthase delta-subunit                                                       |            |
| Lp_c09201p641  | 367            | 0.417 | 0.383 | -0.090 | 100       | 0.030 | 0.030 | -0.015 | LPL5          | all        |                   |       | 0.346 |            | ATP synthase delta-subunit                                                       |            |
| Lp_c10619p774  | 368            | 0.413 | 0.424 | 0.025  | 100       | 0.500 | 0.490 | -0.026 |               | all        |                   | 1     | 0.043 | Negative   | dehydration responsive/ S-adenosyl-L-methionine-dependent methyltransferase      |            |
| Lp_c10940p79   | 366            | 0.456 | 0.481 | 0.050  | 100       | 0.020 | 0.020 | -0.010 |               | all        |                   |       | 0.372 |            | Glycosyl transferase family 90                                                   |            |
| Lp_c11275p339  | 368            | 0.508 | 0.482 | -0.056 | 100       | 0.020 | 0.020 | -0.010 |               | all        |                   |       | 0.886 |            | thioredoxin superfamily protein                                                  |            |

| Locus          | Lodgepole pine |       |       |        | Jack pine |       |       |        | Linkage group | Data       | Outlier Detection |       |       | Introgress | Direction                  | Annotation                                                                                |
|----------------|----------------|-------|-------|--------|-----------|-------|-------|--------|---------------|------------|-------------------|-------|-------|------------|----------------------------|-------------------------------------------------------------------------------------------|
|                | N              | Ho    | UHe   | F      | N         | Ho    | UHe   | F      |               |            | Species           | Lodge | Jack  |            |                            |                                                                                           |
| Lp_c12025p1415 | 368            | 0.231 | 0.229 | -0.009 | 100       | 0.030 | 0.030 | -0.015 |               | all        |                   |       |       | 0.738      |                            | core-2/l-branching beta-1,6-N-acetylglucosaminyltransferase family protein                |
| Lp_c13667p869  | 368            | 0.166 | 0.157 | -0.059 | 100       | 0.010 | 0.010 | -0.005 |               | species/Lp |                   |       |       | 0.39       |                            | proteasome beta subunit/N-terminal nucleophile aminohydrolases superfamily protein        |
| Lp_c13778p292  | 347            | 0.369 | 0.480 | 0.230  | 100       | 0.470 | 0.488 | 0.032  | JPLP3         | all        | 1                 | 1     | 0.001 | Negative   | purple acid phosphatase 18 |                                                                                           |
| Lp_c13778p747  | 367            | 0.411 | 0.442 | 0.067  | 100       | 0.300 | 0.396 | 0.239  | JPLP3         | all        | 1                 | 1     | 0.145 | Negative   | purple acid phosphatase 18 |                                                                                           |
| Lp_c14079p1373 | 363            | 0.551 | 0.488 | -0.130 | 99        | 0.455 | 0.394 | -0.159 |               | all        | 1                 |       |       | 0.186      | Negative                   | enolase                                                                                   |
| Lp_c14699p1329 | 368            | 0.046 | 0.045 | -0.024 |           |       |       |        |               | Lp         |                   |       |       |            |                            | haloacid dehalogenase-like hydrolase superfamily protein                                  |
| Lp_c14699p706  | 368            | 0.500 | 0.500 | -0.001 | 100       | 0.130 | 0.122 | -0.070 |               | all        |                   | 1     |       | 0.04       |                            | haloacid dehalogenase-like hydrolase superfamily protein                                  |
| Lp_c14947p720  | 368            | 0.429 | 0.488 | 0.119  | 100       | 0.060 | 0.058 | -0.031 |               | all        |                   |       |       | 0.019      |                            | ribosomal protein L1p/L10e family                                                         |
| Lp_c15030p593  | 304            | 0.368 | 0.379 | 0.026  |           |       |       |        |               | Lp         |                   |       |       |            |                            | senescence associated family protein                                                      |
| Lp_c16370p922  | 367            | 0.308 | 0.311 | 0.008  | 100       | 0.040 | 0.039 | -0.020 |               | all        |                   |       |       | 0.989      |                            | MAP kinase kinase 6/protein tyrosine kinase                                               |
| Lp_c16943p1584 | 368            | 0.109 | 0.108 | -0.010 | 100       | 0.030 | 0.030 | -0.015 |               | all        |                   |       |       | 0.005      |                            | 3-ketoacyl-CoA synthase/chalcone and stilbene synthases/FAE1-Type III polyketide synthase |
| Lp_c17356p659  | 356            | 0.480 | 0.476 | -0.010 | 97        | 0.258 | 0.270 | 0.040  |               | all        |                   |       |       | 0.001      |                            | myb-domain protein/DNA-binding                                                            |
| Lp_c18494p368  | 368            | 0.478 | 0.476 | -0.006 | 100       | 0.050 | 0.049 | -0.026 |               | all        |                   |       |       | 0.603      |                            | glucose-6-phosphate dehydrogenase 6                                                       |
| Lp_c18615p1158 | 366            | 0.194 | 0.193 | -0.007 | 100       | 0.040 | 0.039 | -0.020 |               | all        |                   |       |       | 0.749      |                            | ATP citrate lyase/succinyl-CoA sythetase beta-chain                                       |
| Lp_c19125p748  | 352            | 0.040 | 0.039 | -0.020 | 98        | 0.000 | 0.000 |        |               | species/Lp |                   |       |       | 0          |                            | pyruvate kinase family protein                                                            |
| Lp_c19571p508  | 368            | 0.293 | 0.277 | -0.061 | 100       | 0.010 | 0.010 | -0.005 |               | species/Lp |                   |       |       | 0.013      |                            | RNA 3'-terminal phosphate cyclase/enolpyruvate transferase, alpha/beta                    |
| Lp_c19870p302  | 368            | 0.486 | 0.498 | 0.022  | 100       | 0.080 | 0.077 | -0.042 |               | all        |                   |       |       | 0.005      |                            | protease inhibitor/seed storage/LTP family                                                |
| Lp_c20503p566  | 368            | 0.299 | 0.302 | 0.008  | 100       | 0.000 | 0.000 |        | LP08          | species/Lp |                   |       |       | 0.195      |                            | RAN binding domain protein                                                                |
| Lp_c20831p1035 | 356            | 0.140 | 0.145 | 0.031  | 99        | 0.020 | 0.020 | -0.010 |               | all        |                   |       |       | 0          |                            | NIN like protein 7/PB1 domain                                                             |
| Lp_c21093p679  | 368            | 0.514 | 0.489 | -0.051 | 100       | 0.010 | 0.010 | -0.005 |               | species/Lp |                   |       |       | 0.008      |                            | proteasome subunit alpha type 1                                                           |
| Lp_c21261p452  | 368            | 0.451 | 0.469 | 0.038  |           |       |       |        |               | Lp         |                   |       |       |            |                            | RNA-binding KH domain-containing protein                                                  |
| Lp_c21366p1031 | 363            | 0.375 | 0.425 | 0.118  | 100       | 0.010 | 0.010 | -0.005 |               | species/Lp |                   |       |       | 0.01       |                            | GDSL-like lipase acylhydrolase superfamily protein                                        |
| Lp_c21536p992  | 367            | 0.226 | 0.230 | 0.014  | 100       | 0.440 | 0.437 | -0.011 |               | all        |                   |       |       | 0          |                            | glycosyl hydrolase superfamily protein/endoxylglucan transferase A3                       |
| Lp_c21696p443  | 368            | 0.440 | 0.404 | -0.092 | 100       | 0.000 | 0.000 |        |               | species/Lp |                   |       |       | 0.194      |                            | fatty acid hydroxylase superfamily                                                        |
| Lp_c21731p403  | 368            | 0.500 | 0.479 | -0.045 | 100       | 0.080 | 0.077 | -0.042 |               | all        |                   |       |       | 0.546      |                            | haloacid dehalogenase-like hydrolase superfamily protein                                  |
| Lp_c21879p397  | 368            | 0.209 | 0.200 | -0.046 | 100       | 0.090 | 0.086 | -0.047 |               | all        |                   |       |       | 0.338      |                            | Acyl CoA binding protein                                                                  |
| Lp_c22300p474  | 366            | 0.030 | 0.035 | 0.139  |           |       |       |        |               | Lp         |                   |       |       |            |                            | serine carbosypeptidase like                                                              |
| Lp_c22393p548  | 368            | 0.427 | 0.423 | -0.010 | 100       | 0.010 | 0.010 | -0.005 | LP09          | species/Lp |                   |       |       | 0.599      |                            | protein kinases/ubiquitin-protein ligase                                                  |
| Lp_c22542p803  | 368            | 0.429 | 0.430 | 0.001  | 100       | 0.410 | 0.410 | -0.006 |               | all        |                   |       |       | 0.777      |                            | glutamate synthase (ferredoxin)/NADH-dependent                                            |
| Lp_c22767p940  | 360            | 0.197 | 0.196 | -0.009 | 99        | 0.242 | 0.214 | -0.138 |               | all        |                   |       |       | 0.133      |                            | arabinogalactan protein 2                                                                 |
| Lp_c23304p610  | 368            | 0.421 | 0.439 | 0.040  | 99        | 0.455 | 0.443 | -0.031 |               | all        |                   |       |       | 0          |                            | chaperonin-60 alpha/TCP-1                                                                 |
| Lp_c23425p1676 | 311            | 0.354 | 0.342 | -0.035 |           |       |       |        |               | Lp         |                   |       |       |            |                            | BEL1-like homeodomain/DNA binding transcription factor                                    |
| Lp_c23768p576  | 368            | 0.473 | 0.492 | 0.038  | 100       | 0.430 | 0.494 | 0.125  |               | all        |                   |       |       | 0.001      |                            | casein kinase/protein tyrosine kinase                                                     |
| Lp_c23779p298  | 365            | 0.153 | 0.156 | 0.013  |           |       |       |        |               | Lp         |                   |       |       |            |                            | zinc-binding alcohol dehydrogenase, NAD binding/cinnamyl alcohol dehydrogenase 5          |
| Lp_c23779p894  | 363            | 0.201 | 0.224 | 0.100  |           |       |       |        |               | Lp         |                   |       |       |            |                            | zinc-binding alcohol dehydrogenase, NAD binding/cinnamyl alcohol dehydrogenase 5          |
| Lp_c24197p836  | 368            | 0.435 | 0.428 | -0.017 | 100       | 0.030 | 0.030 | -0.015 |               | all        |                   |       |       | 0.462      |                            | RED-like protein                                                                          |
| Lp_c24207p657  |                |       |       |        | 95        | 0.063 | 0.100 | 0.367  |               | Jp         |                   |       |       |            |                            | chalcone-flavanone isomerase                                                              |
| Lp_c24391p1138 | 368            | 0.473 | 0.501 | 0.054  | 100       | 0.050 | 0.049 | -0.026 | JPLP4         | all        |                   |       |       | 0.305      |                            | ARF-GAP domain 6/putative GTPase activating protein for Arf                               |
| Lp_c24391p444  | 367            | 0.482 | 0.501 | 0.035  | 100       | 0.050 | 0.049 | -0.026 | JPLP4         | all        |                   |       |       | 0.464      |                            | ARF-GAP domain 6/putative GTPase activating protein for Arf                               |
| Lp_c24502p363  | 367            | 0.460 | 0.486 | 0.052  | 99        | 0.020 | 0.020 | -0.010 |               | all        |                   |       |       | 0.001      |                            | modified of rudimentary protein (Mod (r ))                                                |
| Lp_c24551p196  | 367            | 0.057 | 0.056 | -0.029 |           |       |       |        |               | Lp         |                   |       |       |            |                            | glycosyl hydrolase superfamily protein                                                    |
| Lp_c24551p2210 | 368            | 0.332 | 0.335 | 0.008  | 100       | 0.000 | 0.000 |        |               | species/Lp |                   |       |       | 0.949      |                            | glycosyl hydrolase superfamily protein                                                    |
| Lp_c24582p834  | 368            | 0.448 | 0.463 | 0.030  | 100       | 0.000 | 0.000 |        |               | species/Lp |                   |       |       | 0.059      |                            | ATPase family associated (AAA)/triphosphate hydrolases superfamily                        |

| Locus          | Lodgepole pine |       |       |        | Jack pine |       |       |        | Linkage group | Data       | Outlier Detection |       |       | Introgress | Direction                                                                       | Annotation |
|----------------|----------------|-------|-------|--------|-----------|-------|-------|--------|---------------|------------|-------------------|-------|-------|------------|---------------------------------------------------------------------------------|------------|
|                | N              | Ho    | UHe   | F      | N         | Ho    | UHe   | F      |               |            | Species           | Lodge | Jack  |            |                                                                                 |            |
| Lp_c24702p966  | 363            | 0.471 | 0.482 | 0.021  | 100       | 0.030 | 0.030 | -0.015 |               | all        |                   | 1     | 0.452 | Positive   | FAR-17a/AIG1-like protein                                                       |            |
| Lp_c24728p554  | 368            | 0.429 | 0.498 | 0.137  | 100       | 0.030 | 0.049 | 0.385  |               | all        |                   |       | 0.002 |            | ribosomal protein S4 (RPS4A)                                                    |            |
| Lp_c25137p1866 | 368            | 0.514 | 0.499 | -0.031 | 100       | 0.030 | 0.030 | -0.015 |               | all        |                   |       | 0.933 |            | COBRA-like extracellular glycosyl-phosphatidyl inositol-anchored protein family |            |
| Lp_c25194p1160 | 341            | 0.422 | 0.496 | 0.147  | 100       | 0.070 | 0.068 | -0.036 |               | all        |                   |       | 0.274 |            | Aluminum induced protein with YGL and LRDR motifs                               |            |
| Lp_c25309p582  | 368            | 0.424 | 0.432 | 0.018  | 100       | 0.030 | 0.030 | -0.015 |               | all        |                   |       | 0.008 |            | chaperone protein dnaJ-related                                                  |            |
| Lp_c25811p401  | 367            | 0.436 | 0.439 | 0.005  | 100       | 0.040 | 0.039 | -0.020 |               | all        |                   |       | 0.023 |            | alto/keto reductase family/NAD(P)-linked oxidoreductase superfamily             |            |
| Lp_c26195p495  | 367            | 0.093 | 0.108 | 0.141  | 100       | 0.010 | 0.010 | -0.005 |               | species/Lp |                   |       | 0.964 |            | iron binding zinc finger CDGSH type/similar to kinesin like protein             |            |
| Lp_c26630p901  | 356            | 0.404 | 0.412 | 0.016  |           |       |       |        |               | Lp         |                   |       |       |            | peptidase c65 otubain/ubiquitin thioesterase otubain                            |            |
| Lp_c26844p544  | 365            | 0.334 | 0.304 | -0.102 | 100       | 0.000 | 0.000 |        |               | species/Lp |                   |       | 0.243 |            | ornithine-delta-aminotransferase/aminotransferase class III                     |            |
| Lp_c26937p895  | 330            | 0.342 | 0.369 | 0.072  |           |       |       |        |               | Lp         |                   |       |       |            | pollen Ole e 1 allergen and extensin family protein                             |            |
| Lp_c27142p1396 | 363            | 0.416 | 0.355 | -0.174 |           |       |       |        |               | Lp         |                   |       |       |            | ATPase/hydrogen-exporting ATPase/phosphoenolpyruvate carboxylase                |            |
| Lp_c27765p734  | 361            | 0.524 | 0.501 | -0.047 | 99        | 0.515 | 0.492 | -0.051 |               | all        |                   |       | 0.731 |            | late embryogenesis abundant protein (LEA) family protein                        |            |
| Lp_c28145p330  | 367            | 0.319 | 0.340 | 0.061  | 100       | 0.320 | 0.297 | -0.084 | LPL6          | all        |                   | 1     | 0.022 | Positive   | NifU-like protein 2                                                             |            |
| Lp_c28145p756  | 368            | 0.245 | 0.258 | 0.052  | 100       | 0.010 | 0.010 | -0.005 | LPL6          | species/Lp |                   |       | 0.445 |            | NifU-like protein 2                                                             |            |
| Lp_c28426p547  | 368            | 0.188 | 0.175 | -0.076 | 100       | 0.000 | 0.000 |        |               | species/Lp |                   |       | 0.879 |            | ribosomal protein L16p/L10e family                                              |            |
| Lp_c28483p683  | 352            | 0.497 | 0.479 | -0.039 |           |       |       |        |               | Lp         |                   |       |       |            | Protein of unknown function (DUF760)                                            |            |
| Lp_c29024p781  | 361            | 0.504 | 0.498 | -0.013 | 100       | 0.300 | 0.297 | -0.016 |               | all        |                   |       | 0.65  |            | GDP-mannose 3,5-epimerase/NAD                                                   |            |
| Lp_c30198p360  | 368            | 0.380 | 0.422 | 0.097  | 100       | 0.010 | 0.010 | -0.005 |               | species/Lp |                   |       | 0.324 |            | prohibitin                                                                      |            |
| Lp_c30954p847  | 367            | 0.433 | 0.408 | -0.064 | 100       | 0.000 | 0.000 |        |               | species/Lp |                   |       | 0.12  |            | BSD domain-containing protein                                                   |            |
| Lp_c31191p1428 | 366            | 0.331 | 0.359 | 0.077  | 100       | 0.010 | 0.010 | -0.005 |               | species/Lp |                   |       | 0.081 |            | Duplicated homeodomain-like superfamily protein                                 |            |
| Lp_c31206p1180 | 368            | 0.397 | 0.406 | 0.022  | 100       | 0.110 | 0.104 | -0.058 |               | all        |                   |       | 0.002 |            | Protein of unknown function (DUF1423)/potyviral VPg interacting protein 1       |            |
| Lp_c31229p1539 | 368            | 0.473 | 0.461 | -0.028 | 100       | 0.130 | 0.122 | -0.070 |               | all        |                   | 1     | 0.08  |            | galactose oxidase/kelch repeat                                                  |            |
| Lp_c31410p562  | 360            | 0.472 | 0.484 | 0.023  | 100       | 0.010 | 0.010 | -0.005 |               | species/Lp |                   |       | 0.066 |            | aldehyde dehydrogenase family                                                   |            |
| Lp_c31430p340  | 367            | 0.417 | 0.456 | 0.084  | 100       | 0.450 | 0.494 | 0.085  |               | all        |                   | 1     | 0.313 | Negative   | coatomer beta subunit                                                           |            |
| Lp_c31693p433  | 368            | 0.063 | 0.061 | -0.032 | 100       | 0.230 | 0.220 | -0.051 |               | all        |                   |       | 0.683 |            | fatty acid desaturase 2 (FAD2)                                                  |            |
| Lp_c32359p509  | 368            | 0.519 | 0.501 | -0.038 | 100       | 0.020 | 0.020 | -0.010 |               | all        |                   |       | 0.707 |            | ribosomal L28 family                                                            |            |
| Lp_c32518p1291 | 368            | 0.478 | 0.495 | 0.033  | 100       | 0.040 | 0.039 | -0.020 |               | all        |                   |       | 0.32  |            | glycosyl transferase family 8/plant glycogenin-like starch initiation protein   |            |
| Lp_c32989p661  | 368            | 0.342 | 0.350 | 0.020  | 100       | 0.040 | 0.039 | -0.020 |               | all        |                   |       | 0.564 |            | NAD(P)-binding Rossmann-fold/3-beta hydroxysteroid dehydrogenase/isomerase      |            |
| Lp_c33326p690  | 367            | 0.409 | 0.402 | -0.018 | 100       | 0.370 | 0.316 | -0.179 |               | all        |                   | 1     | 0.13  | Negative   | heavy metal transport/myb-like HTH transcriptional regulator family protein     |            |
| Lp_c33380p839  | 368            | 0.481 | 0.498 | 0.034  | 100       | 0.070 | 0.086 | 0.186  |               | all        |                   |       | 0.593 |            | Aluminum induced protein with YGL and LRDR motifs                               |            |
| Lp_c33543p797  | 367            | 0.455 | 0.495 | 0.080  | 100       | 0.040 | 0.039 | -0.020 |               | all        |                   |       | 0.986 |            | similar to Arabisopsis thaliana At1g68490                                       |            |
| Lp_c33997p220  | 368            | 0.280 | 0.268 | -0.047 | 100       | 0.500 | 0.463 | -0.085 |               | all        |                   |       | 0.353 |            | ATP synthase alpha/beta family                                                  |            |
| Lp_c34571p636  | 366            | 0.197 | 0.191 | -0.033 | 100       | 0.080 | 0.077 | -0.042 |               | all        |                   | 1     | 0.353 | Negative   | cytochrome B5 isoform B                                                         |            |
| Lp_c34658p813  | 356            | 0.503 | 0.483 | -0.043 | 100       | 0.010 | 0.010 | -0.005 |               | species/Lp |                   |       | 0.28  |            | triosephosphate isomerase                                                       |            |
| Lp_c35003p642  | 366            | 0.350 | 0.336 | -0.043 | 100       | 0.000 | 0.000 |        |               | species/Lp |                   |       | 0.295 |            | Oxygen evolving enhancer protein 3                                              |            |
| Lp_c35144p736  | 352            | 0.466 | 0.484 | 0.036  | 99        | 0.374 | 0.443 | 0.153  |               | all        |                   |       | 0.013 |            | S1/P1 nuclease/endonuclease 4                                                   |            |
| Lp_c38820p1995 | 353            | 0.544 | 0.496 | -0.099 | 99        | 0.051 | 0.049 | -0.026 | LP03          | all        |                   |       | 0.525 |            | SGNH hydrolase-type esterase superfamily protein                                |            |
| Lp_c38837p2392 | 367            | 0.259 | 0.272 | 0.047  | 100       | 0.040 | 0.039 | -0.020 |               | all        |                   |       | 0.385 |            | TUDOR-SN protein 1/Staphylococcal nuclease homologue                            |            |
| Lp_c41343p893  | 367            | 0.504 | 0.501 | -0.008 | 100       | 0.290 | 0.290 | -0.004 |               | all        |                   |       | 0.048 |            | LUC7 N_terminus domain-containing protein                                       |            |
| Lp_c42715p803  | 368            | 0.043 | 0.043 | -0.022 |           |       |       |        |               | Lp         |                   |       |       |            | importin alpha isoform/armadillo/beta-catenin-like repeat                       |            |
| Lp_c44052p679  | 367            | 0.515 | 0.472 | -0.093 | 100       | 0.050 | 0.049 | -0.026 | LP05          | all        |                   |       | 0.123 |            | UDP-glucuronate decarboxylase/dehydrogenase-isomerase family                    |            |
| Lp_c46762p868  | 365            | 0.348 | 0.302 | -0.154 |           |       |       |        |               | Lp         |                   |       |       |            | nucleic-acid binding domain OB-fold-like protein                                |            |
| Lp_c47525p1103 | 368            | 0.443 | 0.387 | -0.145 | 98        | 0.000 | 0.000 |        |               | species/Lp |                   |       | 0.088 |            | Protein of unknown function (DUF1218)                                           |            |
| Lp_c49110p1018 | 366            | 0.404 | 0.333 | -0.217 | 99        | 0.202 | 0.199 | -0.023 |               | all        |                   |       | 0.011 |            | ATP synthase/gamma subunit/Cellulose synthase family protein                    |            |
